# Supplementary material for: Phosphine Catalyzed Michael-Type Additions: The Synthesis of Glutamic Acid Derivatives from Arylidene-α-amino Esters
Source: MDPI journal article supplement (doi:10.3390/molecules29020342), 2024-01-10
Supplement: s1 [file s1]

# Phosphine Catalyzed Michael-Type Additions: The Synthesis of Glutamic Acid Derivatives from Arylidene- $\alpha$ -amino Esters <sup>†</sup>

Lesly V. Rodríguez-Flórez <sup>1</sup>, María González-Marcos <sup>1</sup>, Eduardo García-Mingüens <sup>2</sup>,  
María de Gracia Retamosa <sup>1</sup>, Misa Kawase <sup>1</sup>, Elisabet Selva <sup>2</sup> and José M. Sansano <sup>1,\*</sup>

<sup>1</sup> Departamento de Química Orgánica, Centro de Innovación en Química Avanzada (ORFEO-CINQA) and Instituto de Síntesis Orgánica, Universidad de Alicante, Ctra. Alicante-San Vicente s/n, 03080 Alicante, Spain

<sup>2</sup> Medalchemy, S. L. Ancha de Castelar, 46-48, entlo. A. San Vicente del Raspeig, 03690 Alicante, Spain

\* Correspondence: jmsansano@ua.es

<sup>†</sup> Dedicated to the memory of Prof. David A. Evans.

## TABLE OF CONTENTS

|                                            |            |
|--------------------------------------------|------------|
| <b>1. NMR COPIES.....</b>                  | <b>S1</b>  |
| <b>2. REPRESENTATIVE FTIR COPIES .....</b> | <b>S29</b> |

## 1. NMR COPIES

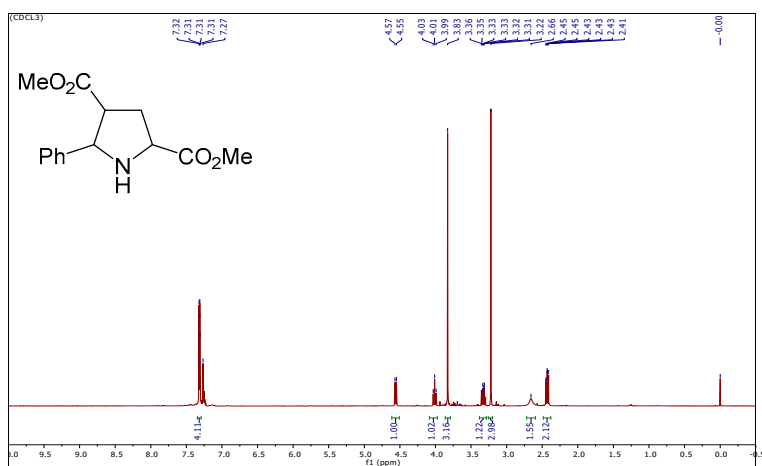

**Figure S1**, <sup>1</sup>H NMR of compound 3a

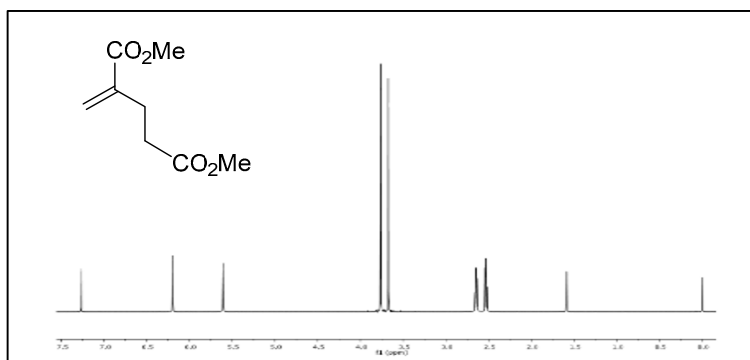

**Figure S2**, <sup>1</sup>H NMR of compound 4

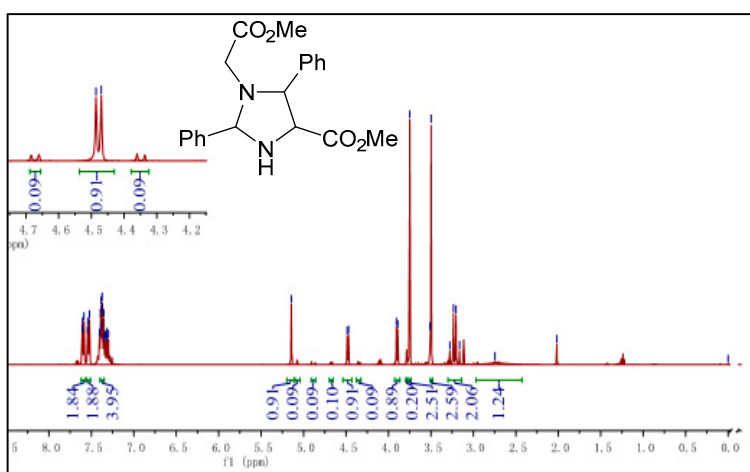

**Figure S3**, <sup>1</sup>H NMR of compound 5

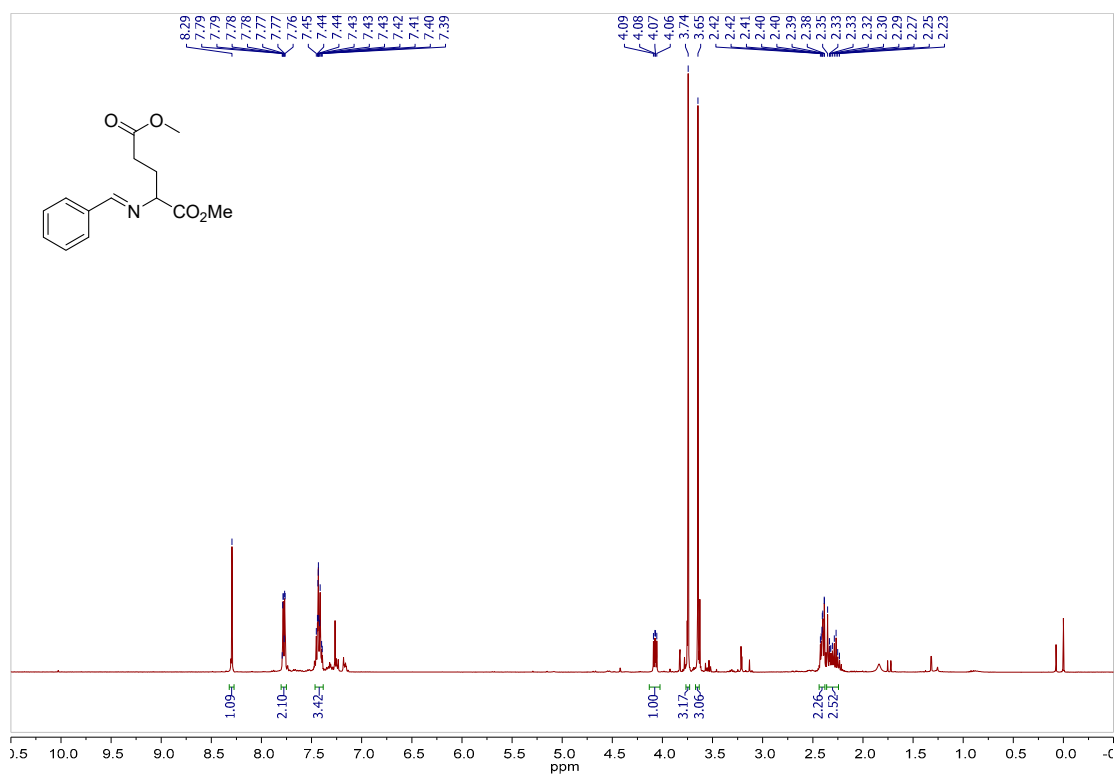

Figure S4, <sup>1</sup>H NMR of compound 2a

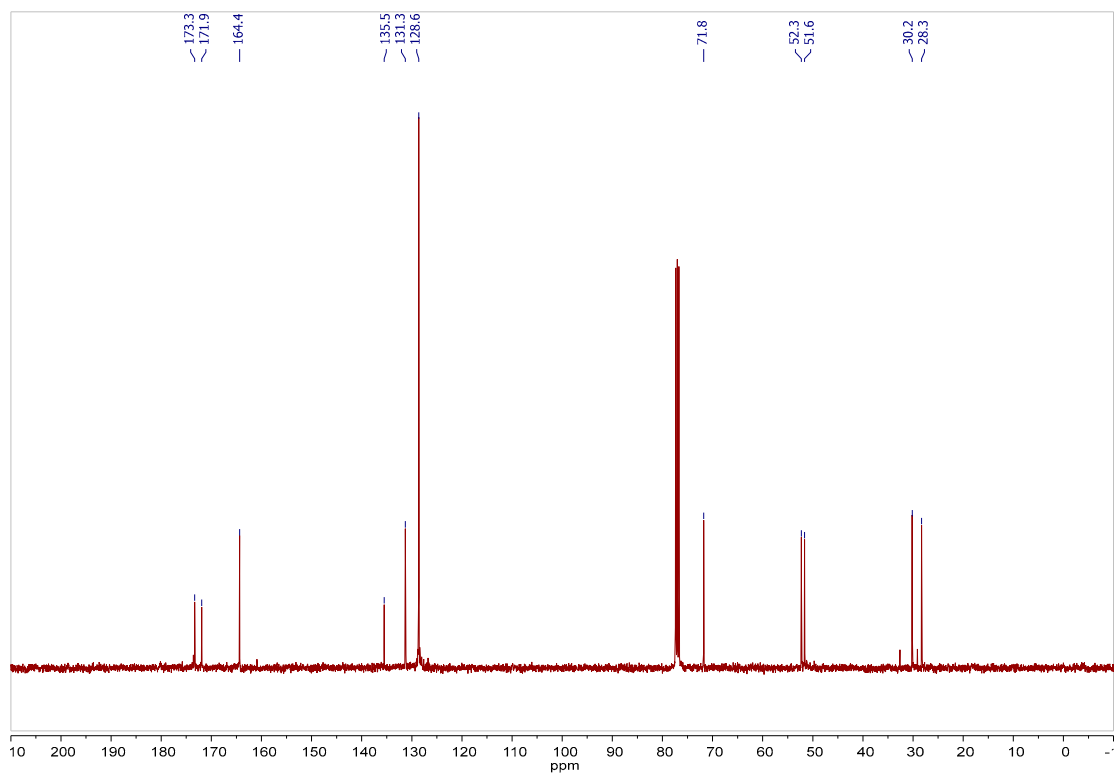

Figure S5, <sup>13</sup>C NMR of compound 2a

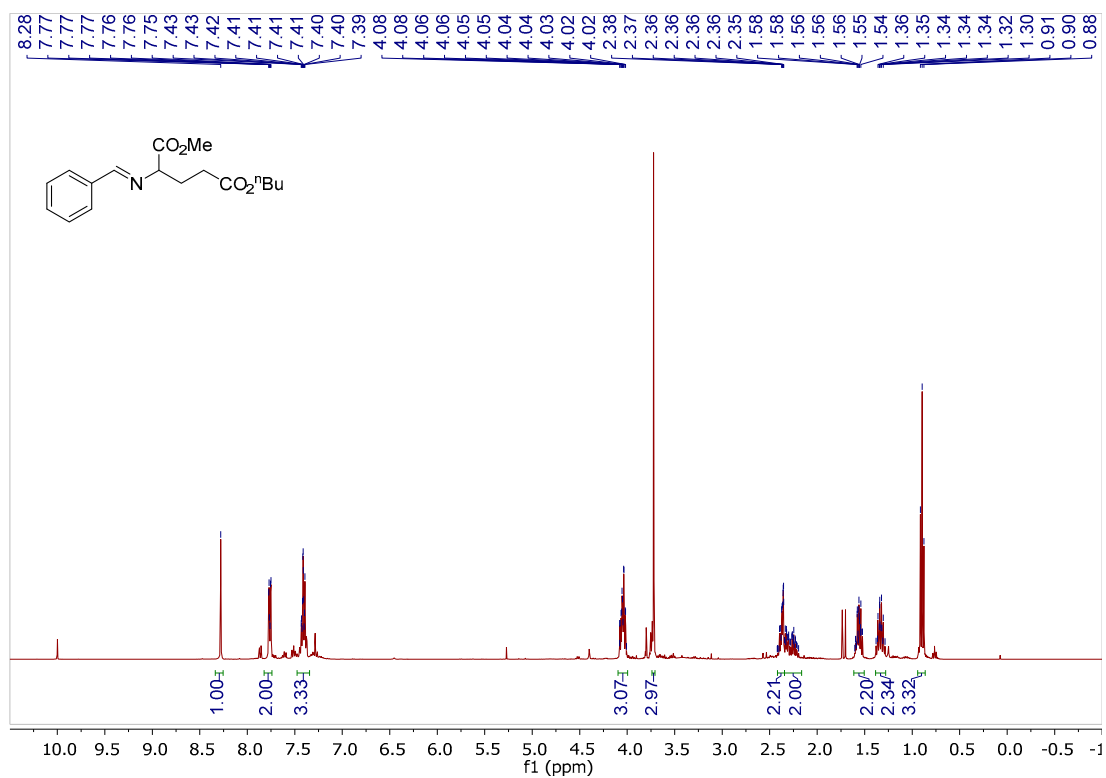

**Figure S6, <sup>1</sup>H NMR of compound **2b****

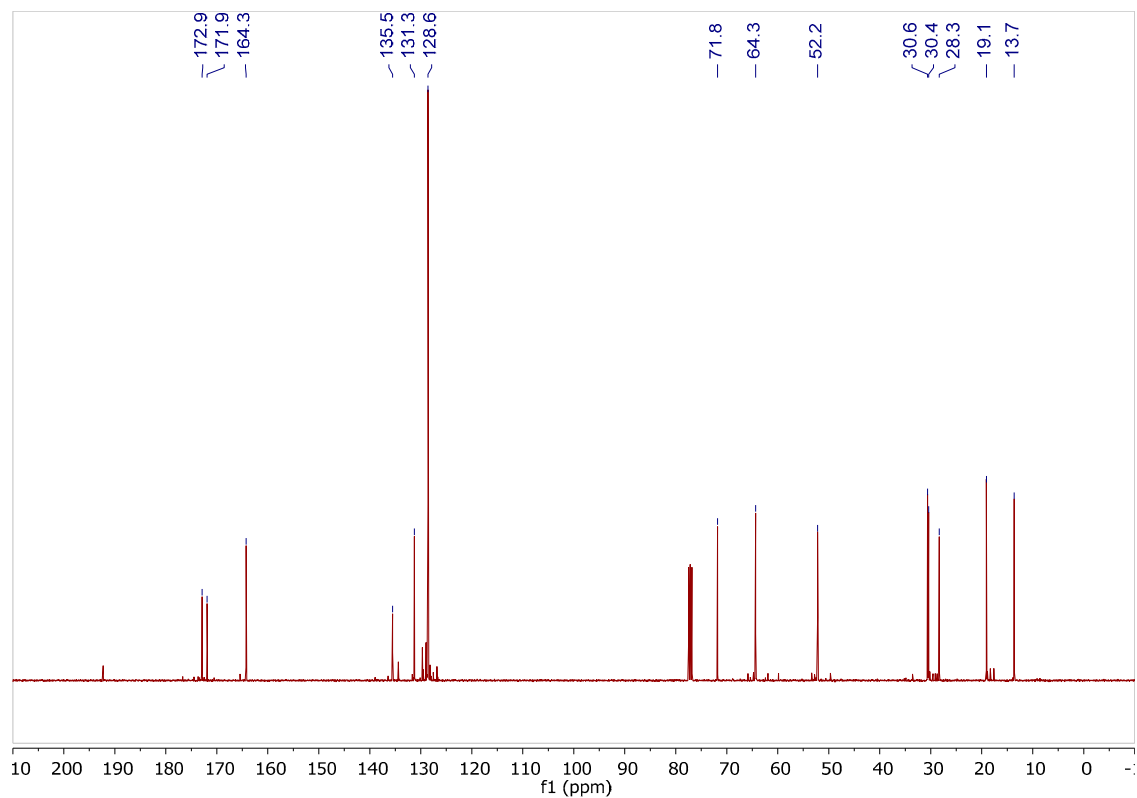

**Figure S7, <sup>13</sup>C NMR of compound **2b****

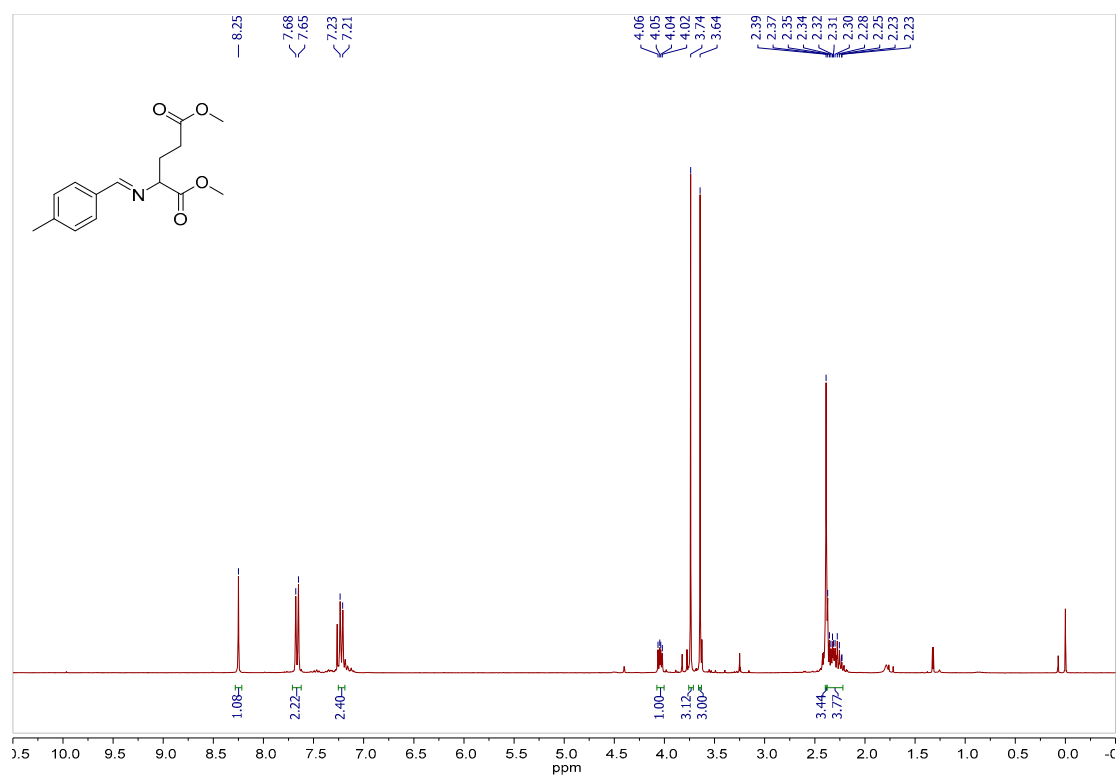

**Figure S8, <sup>1</sup>H NMR of compound 2c**

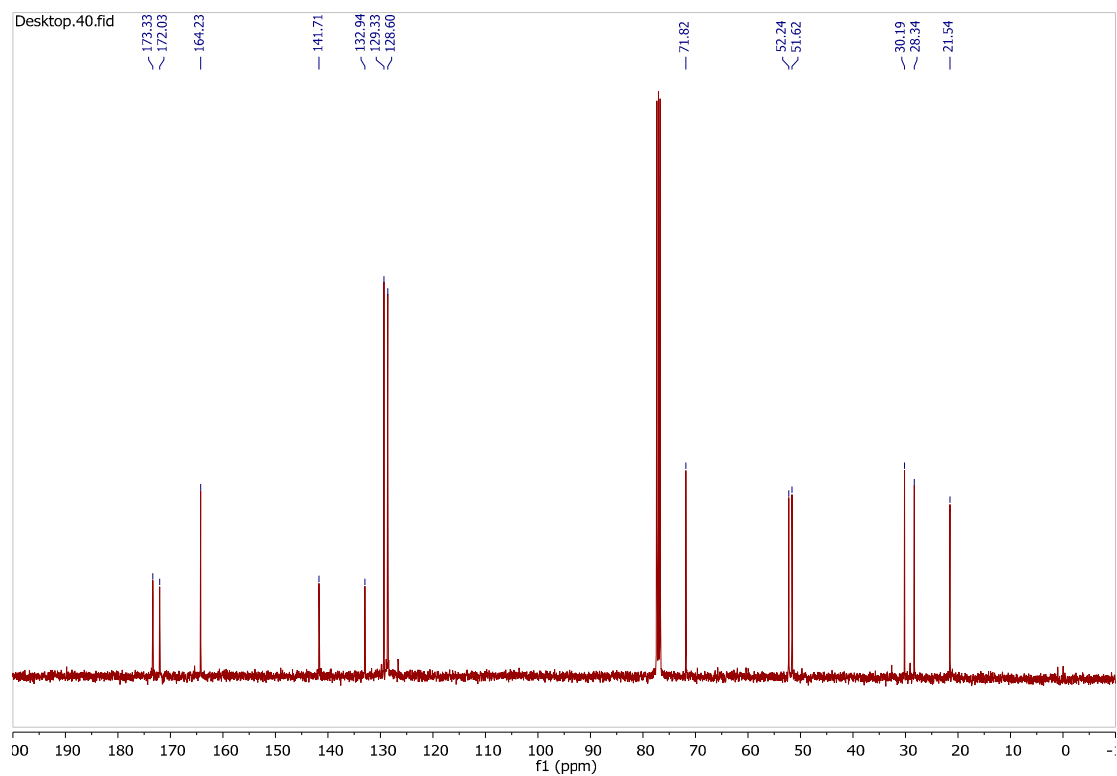

**Figure S9, <sup>13</sup>C NMR of compound 2c**

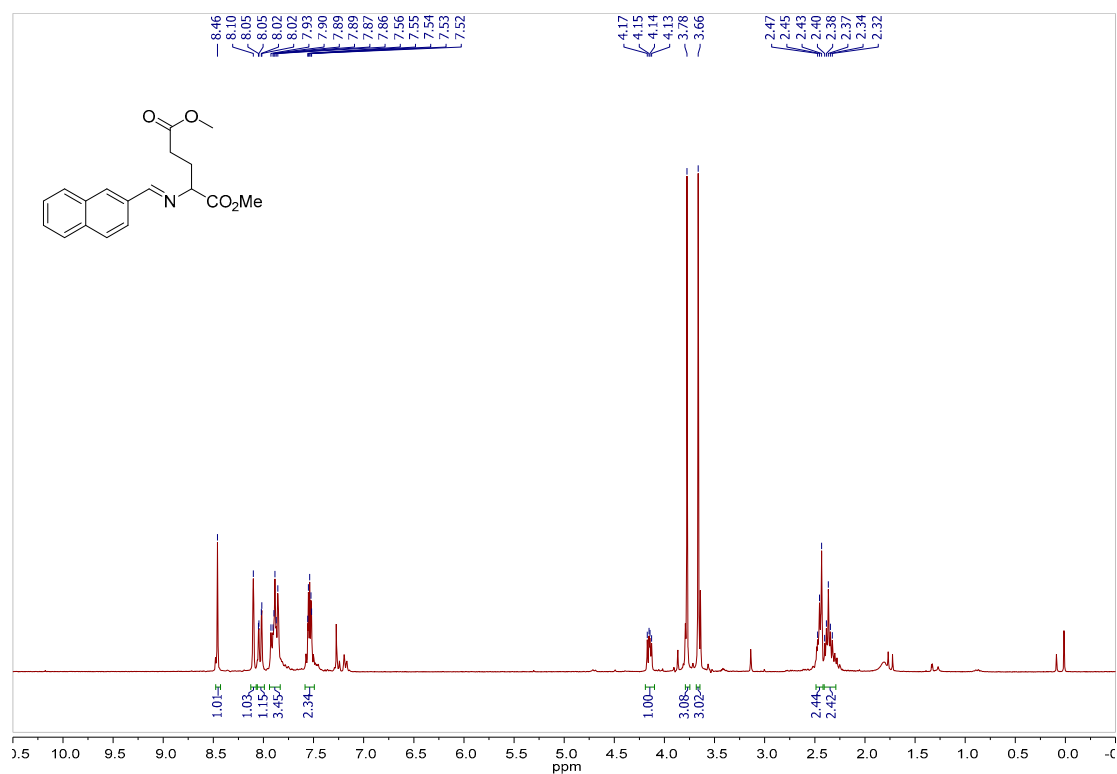

**Figure S10, <sup>1</sup>H NMR of compound 2d**

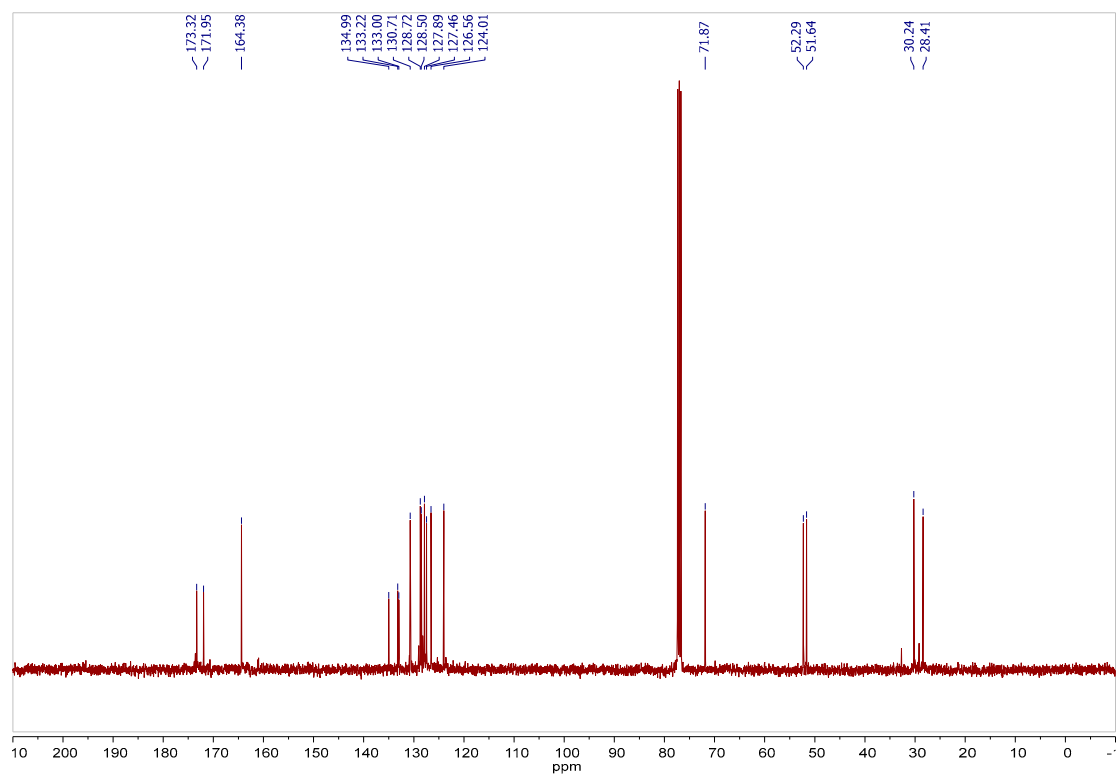

**Figure S11, <sup>13</sup>C NMR of compound 2d**

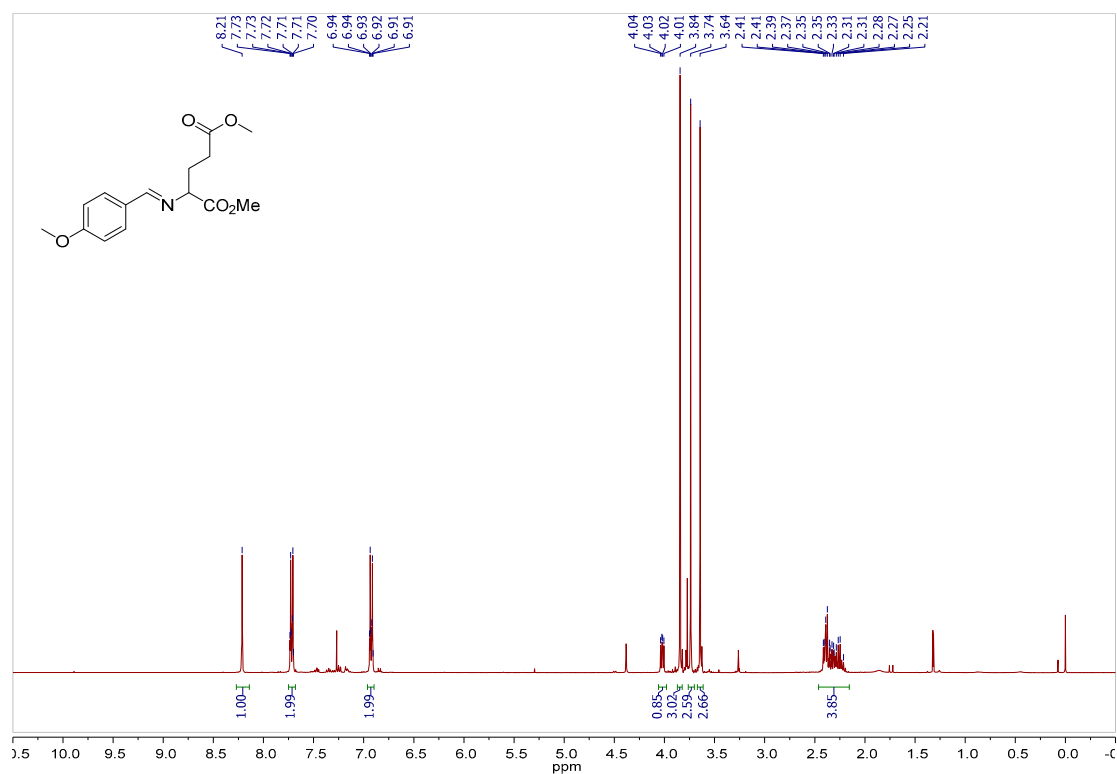

**Figure S12, <sup>1</sup>H NMR of compound 2e**

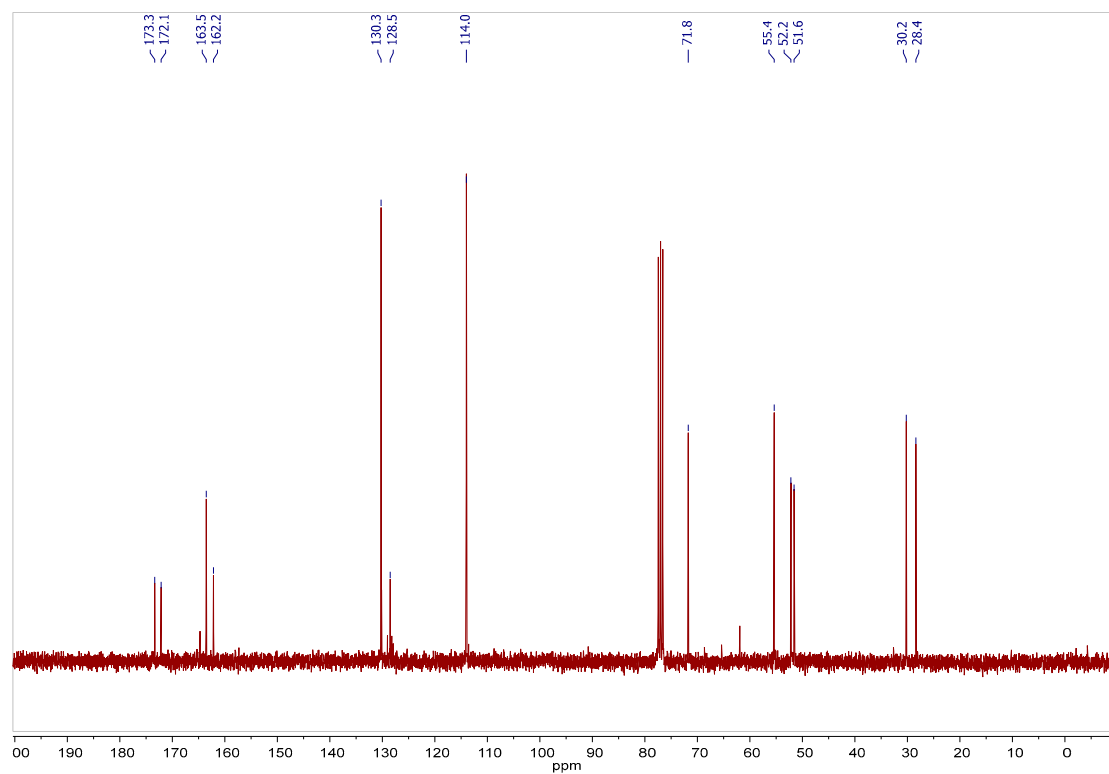

**Figure S13, <sup>13</sup>C NMR of compound 2e**

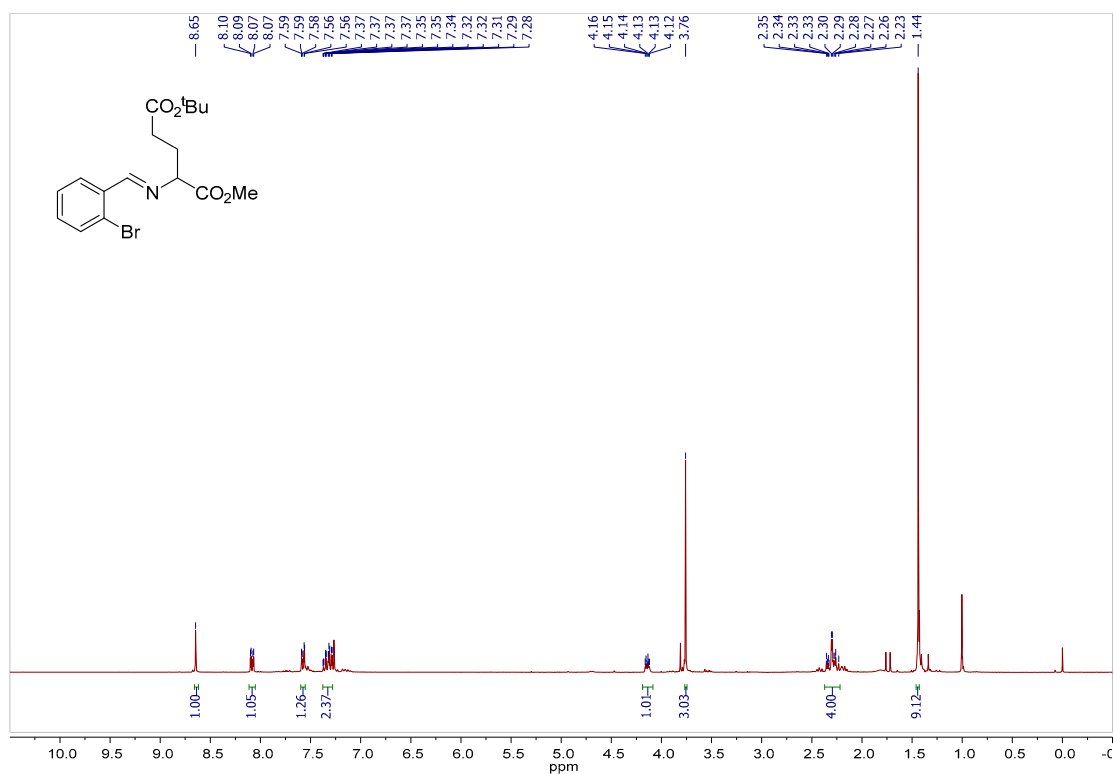

**Figure S14,** <sup>1</sup>H NMR of compound **2f**

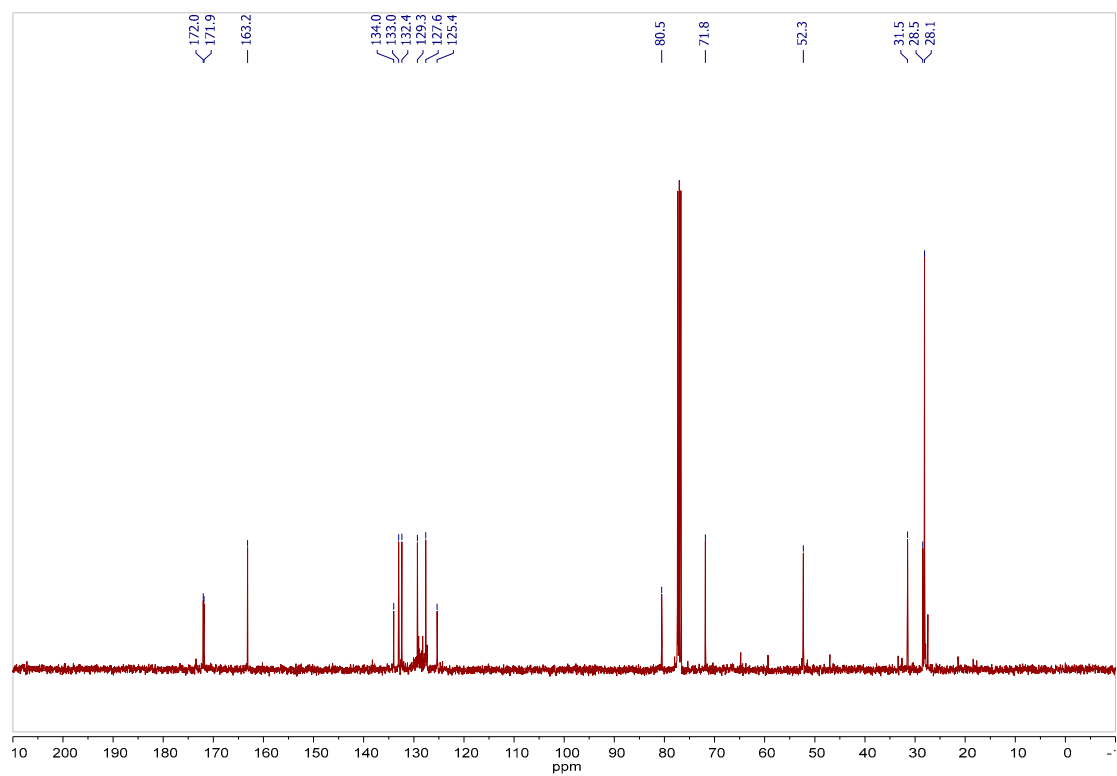

**Figure S15,** <sup>13</sup>C NMR of compound **2f**



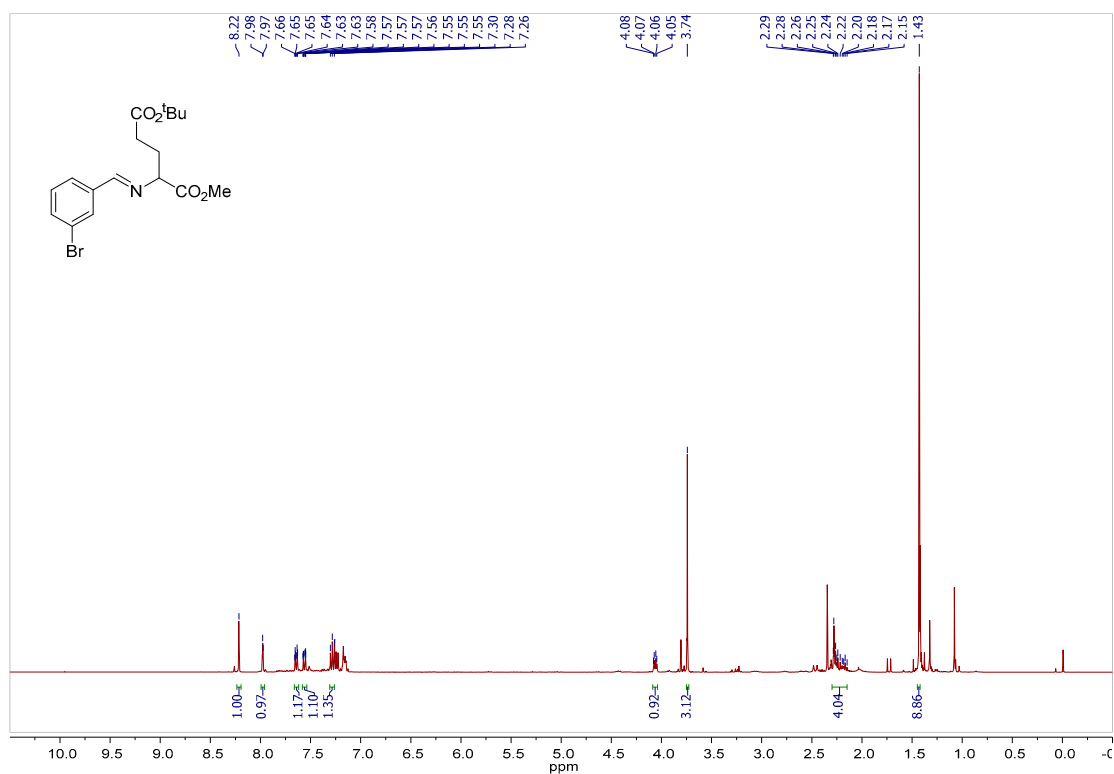

**Figure S16**, <sup>1</sup>H NMR of compound **2g**

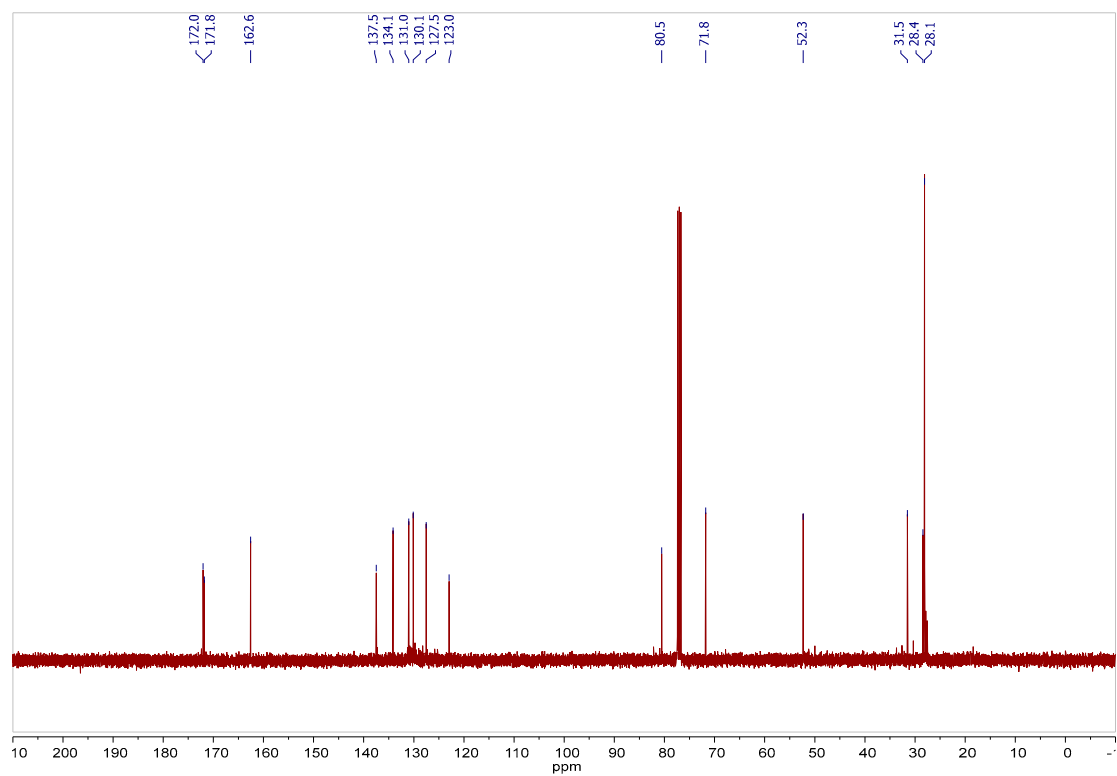

**Figure S17**, <sup>13</sup>C NMR of compound **2g**

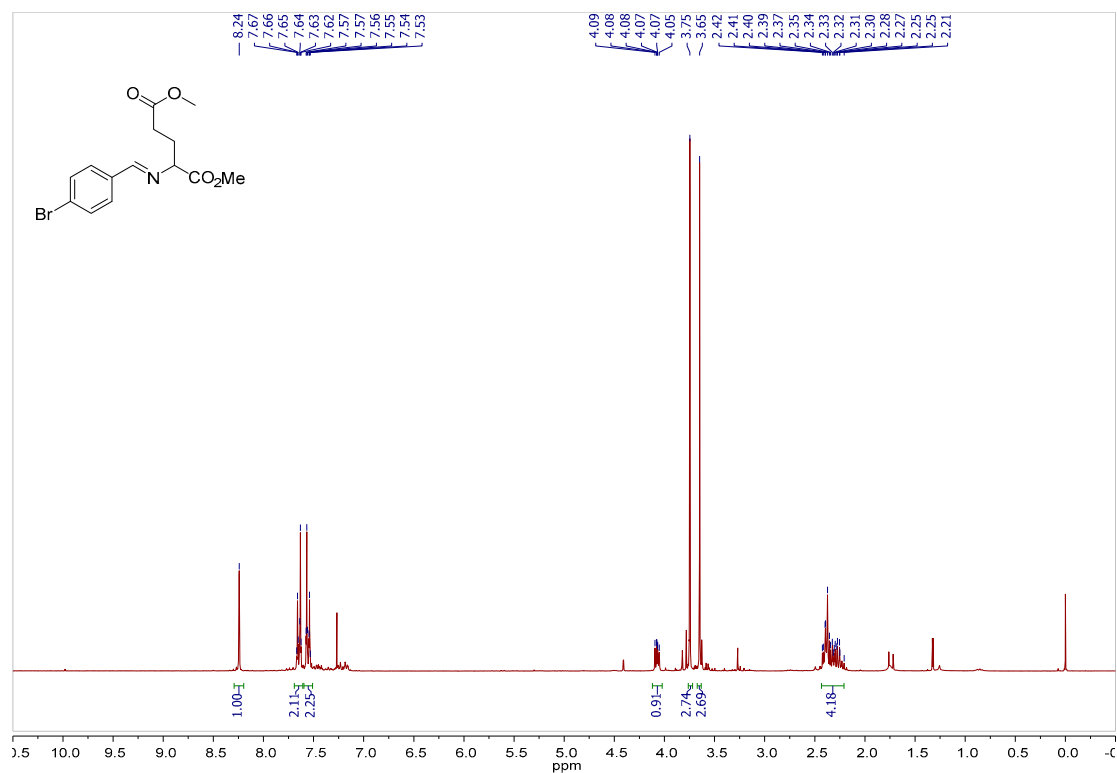

**Figure S18,** <sup>1</sup>H NMR of compound 2h

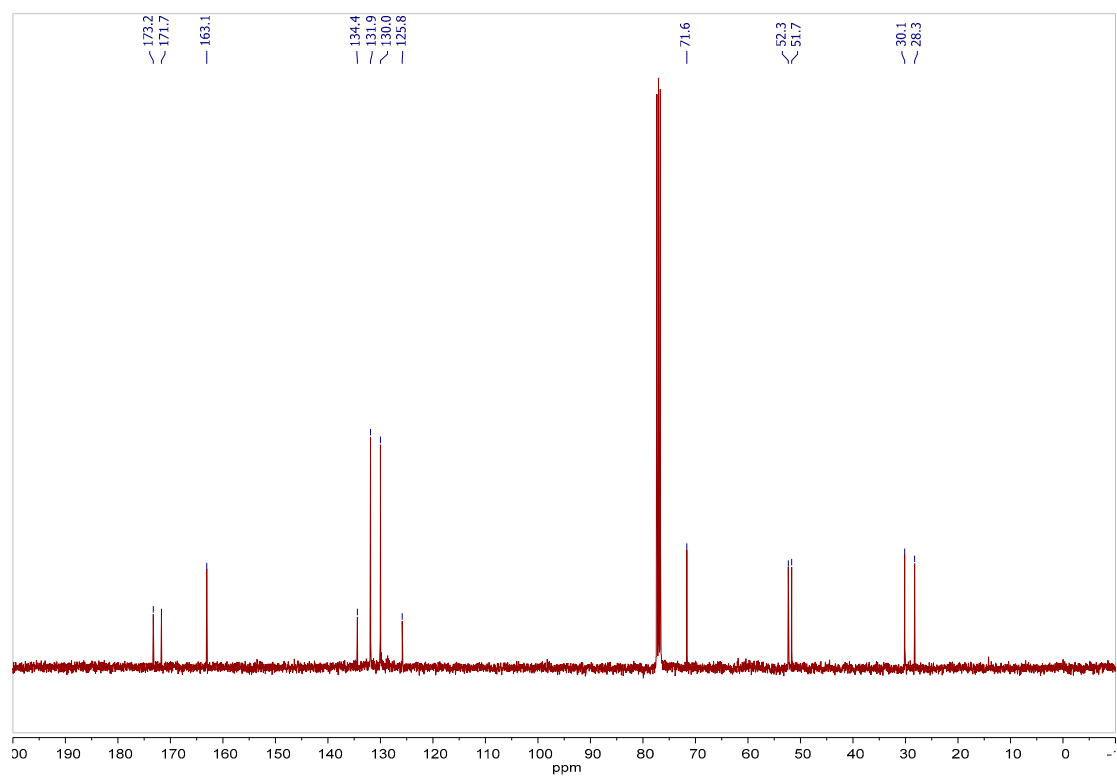

**Figure S19,** <sup>13</sup>C NMR of compound 2h



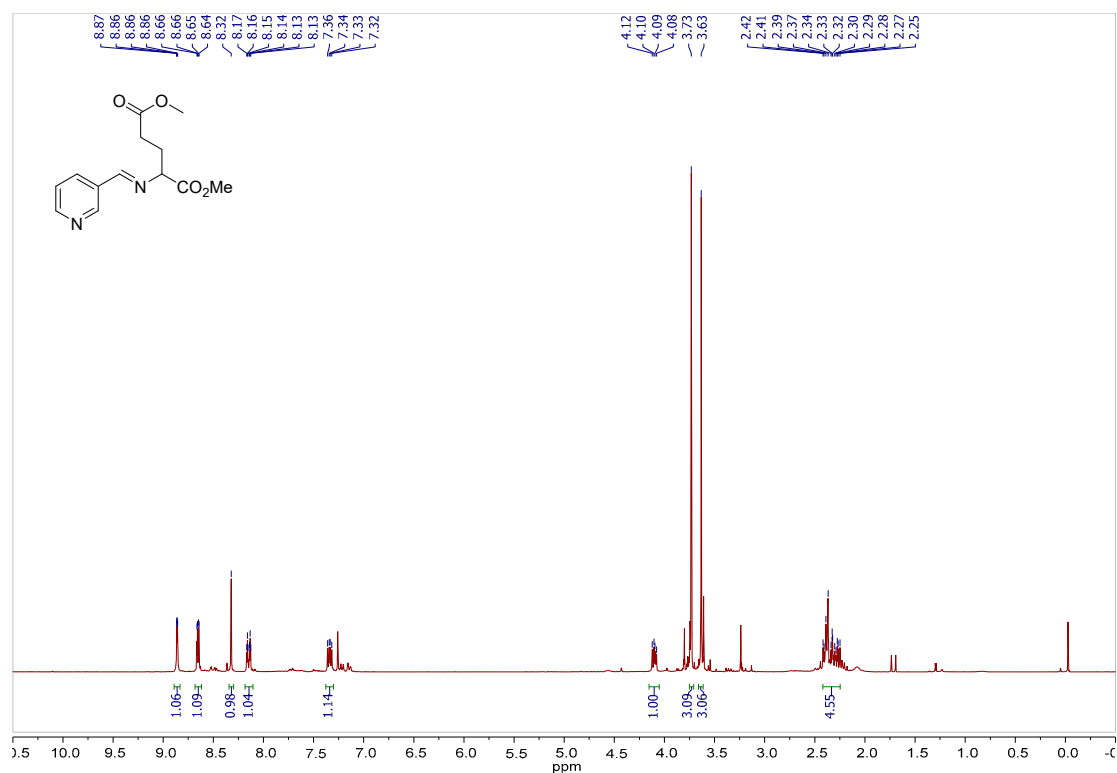

Figure S22, <sup>1</sup>H NMR of compound 2j

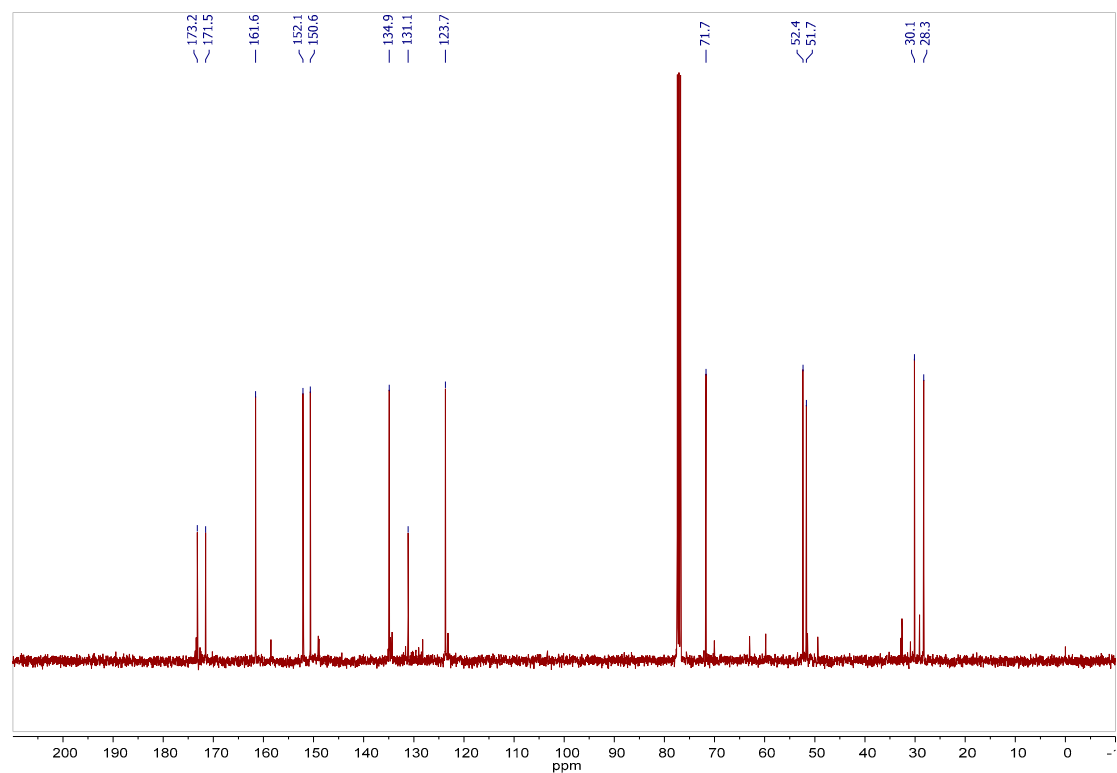

Figure S23, <sup>13</sup>C NMR of compound 2j

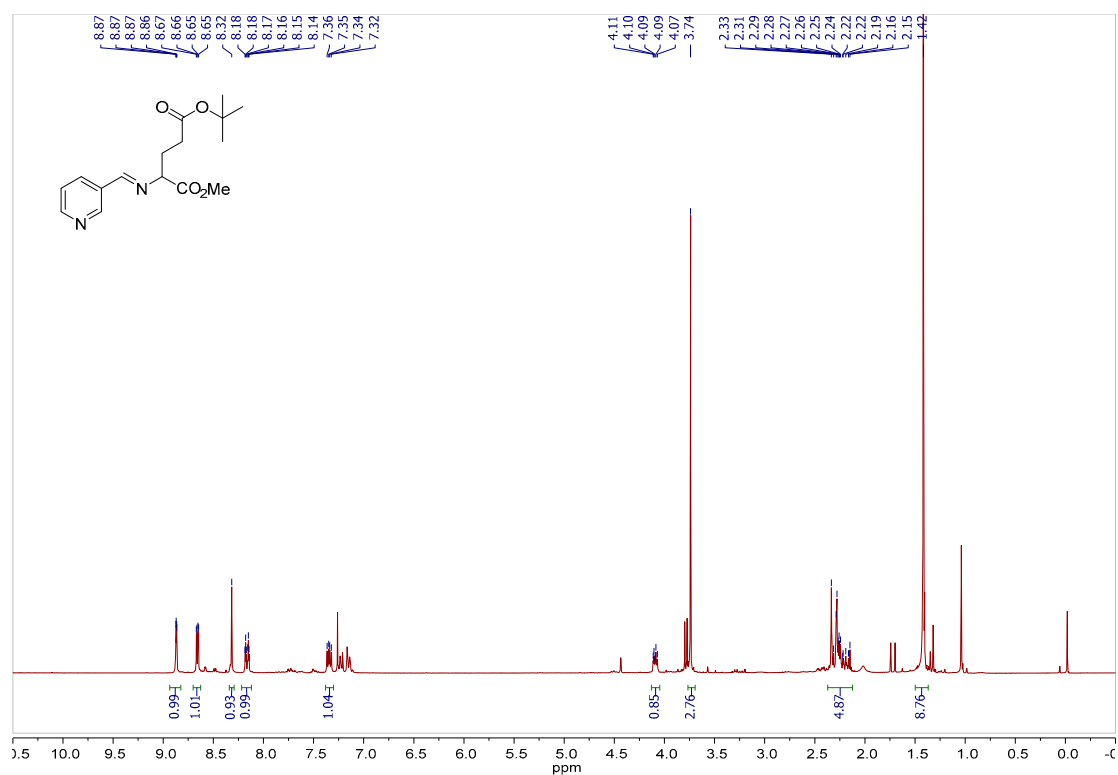

Figure S24, <sup>1</sup>H NMR of compound 2k

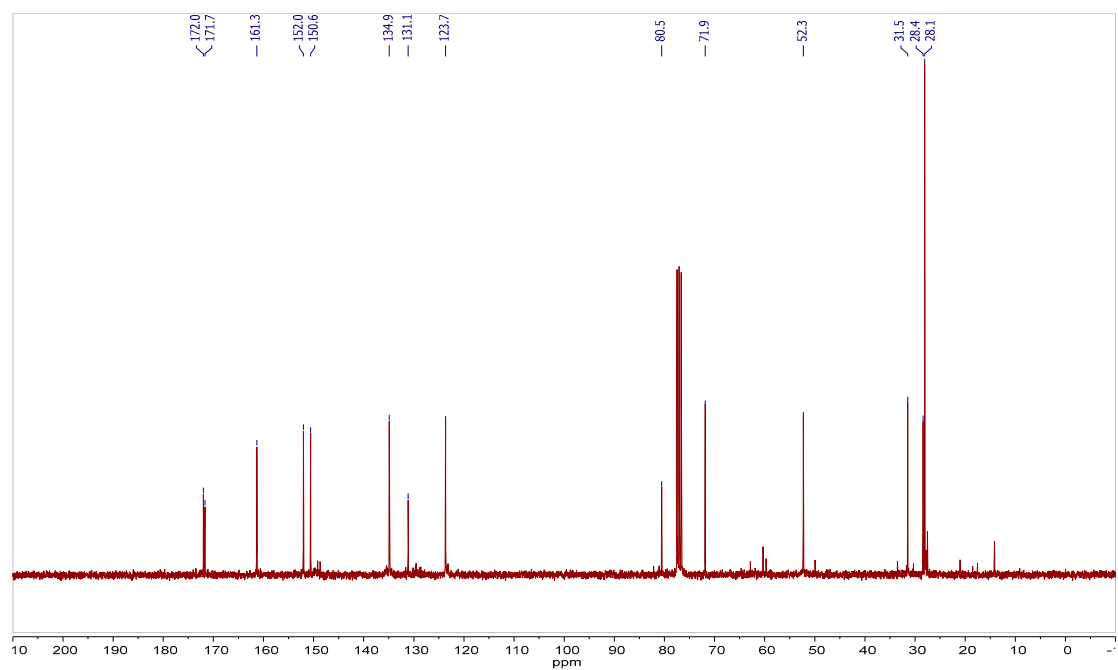

Figure S25, <sup>13</sup>C NMR of compound 2k

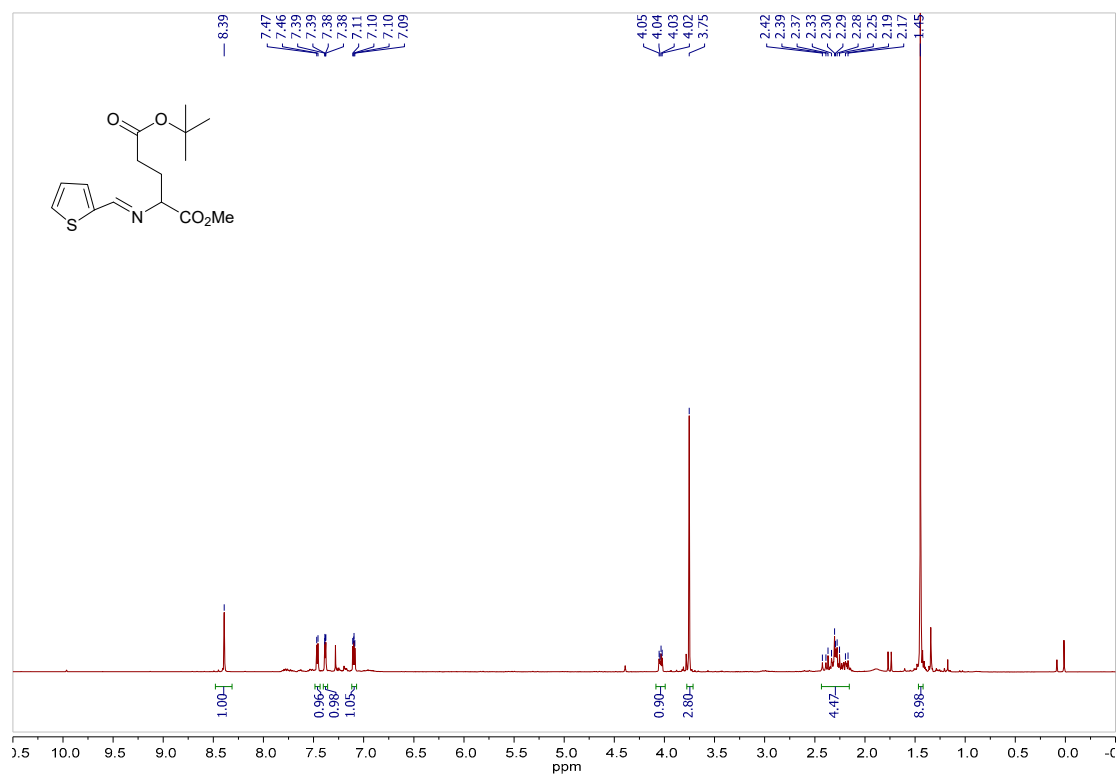

Figure S26, <sup>1</sup>H NMR of compound 2I

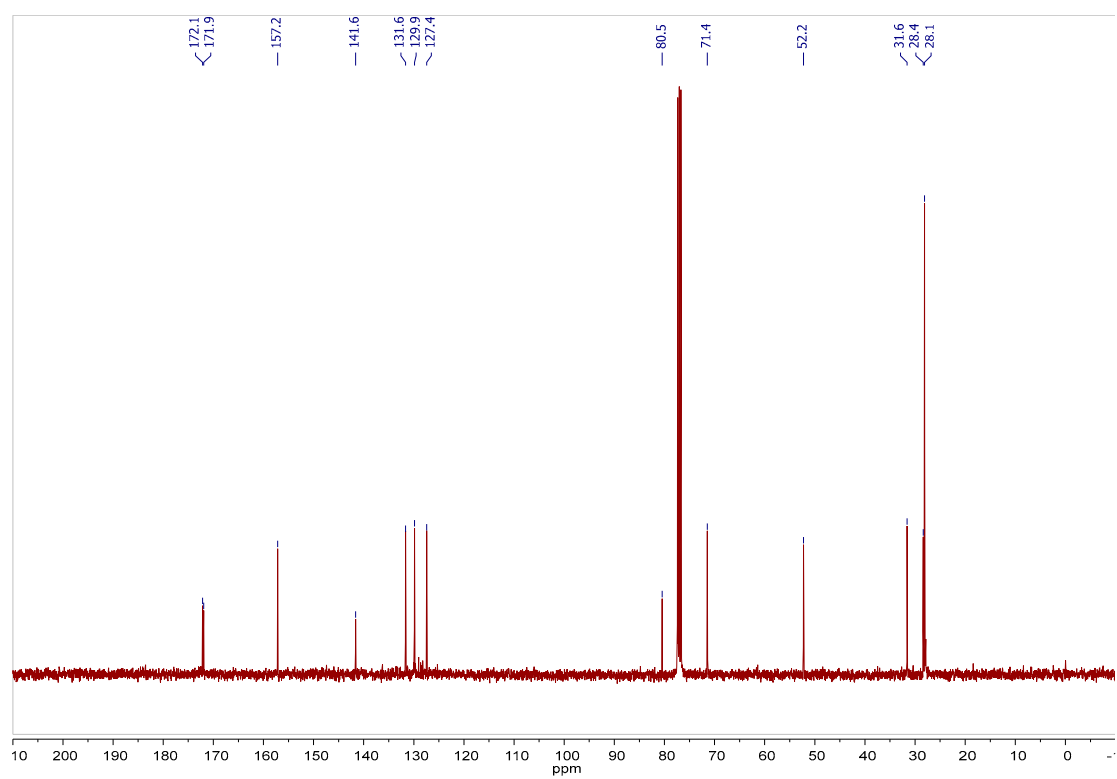

Figure S27, <sup>13</sup>C NMR of compound 2I

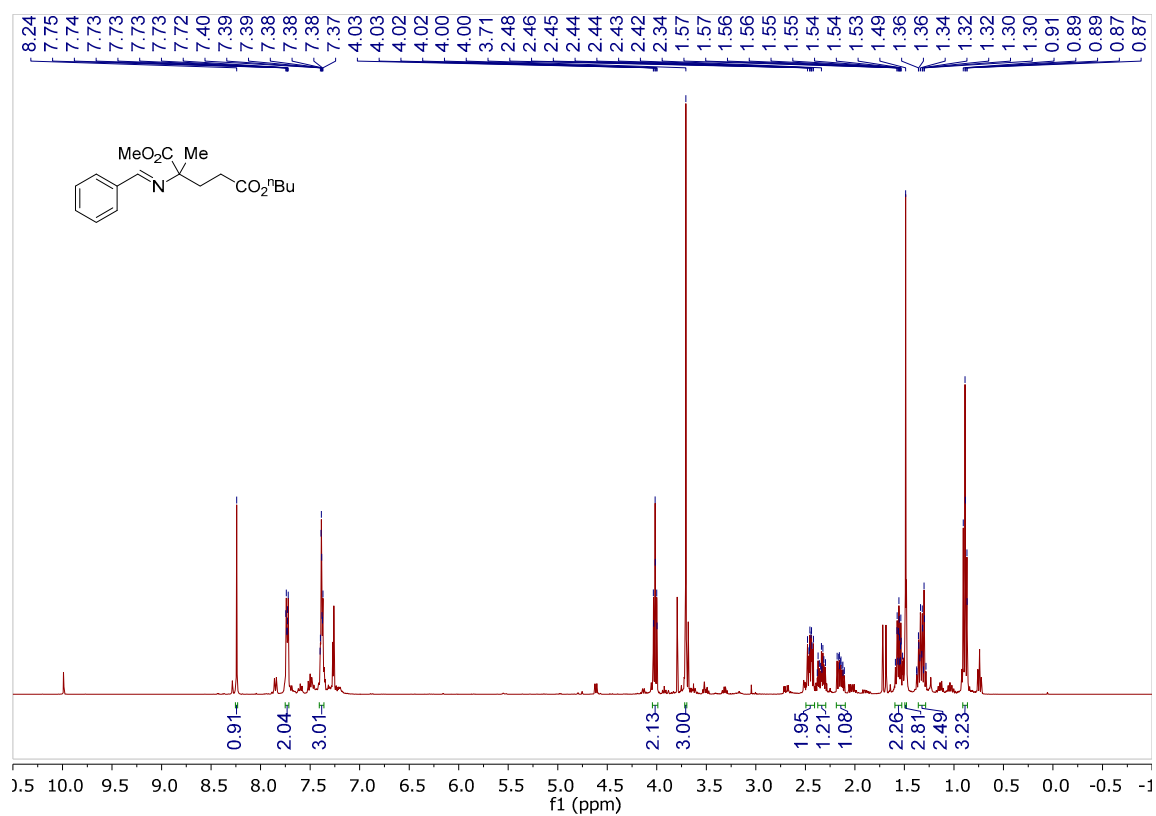

Figure S28, <sup>1</sup>H NMR of compound 2m

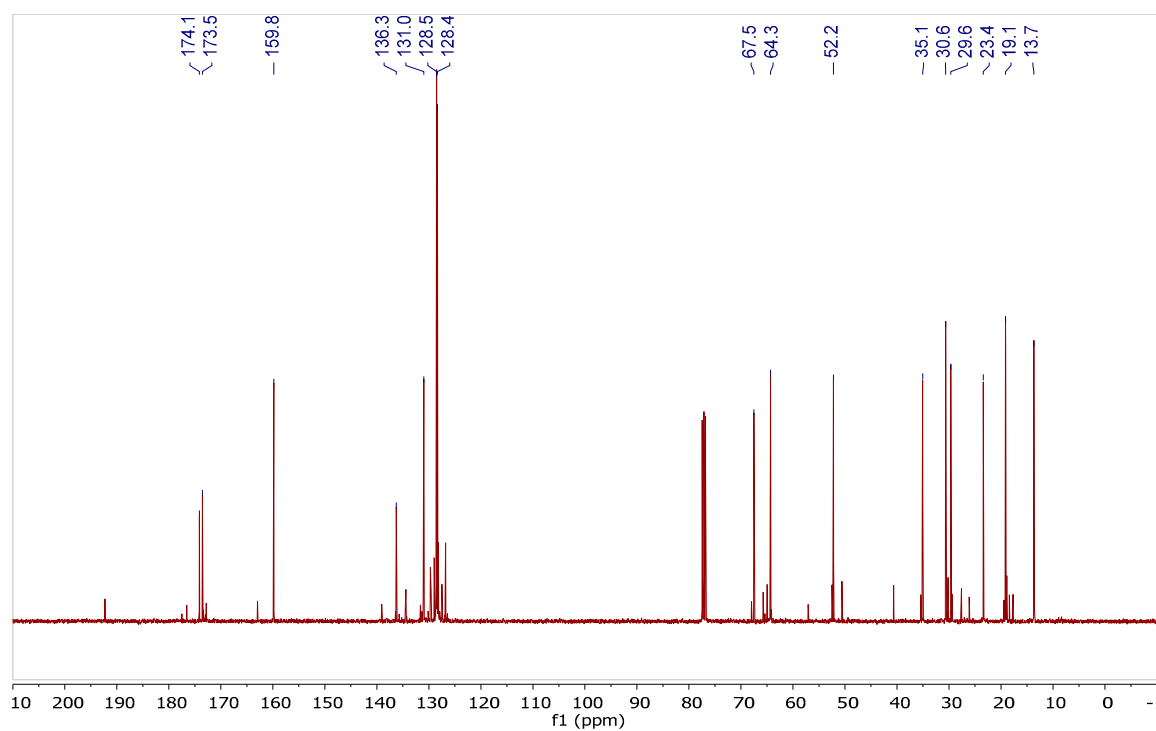

Figure S29, <sup>13</sup>C NMR of compound 2m

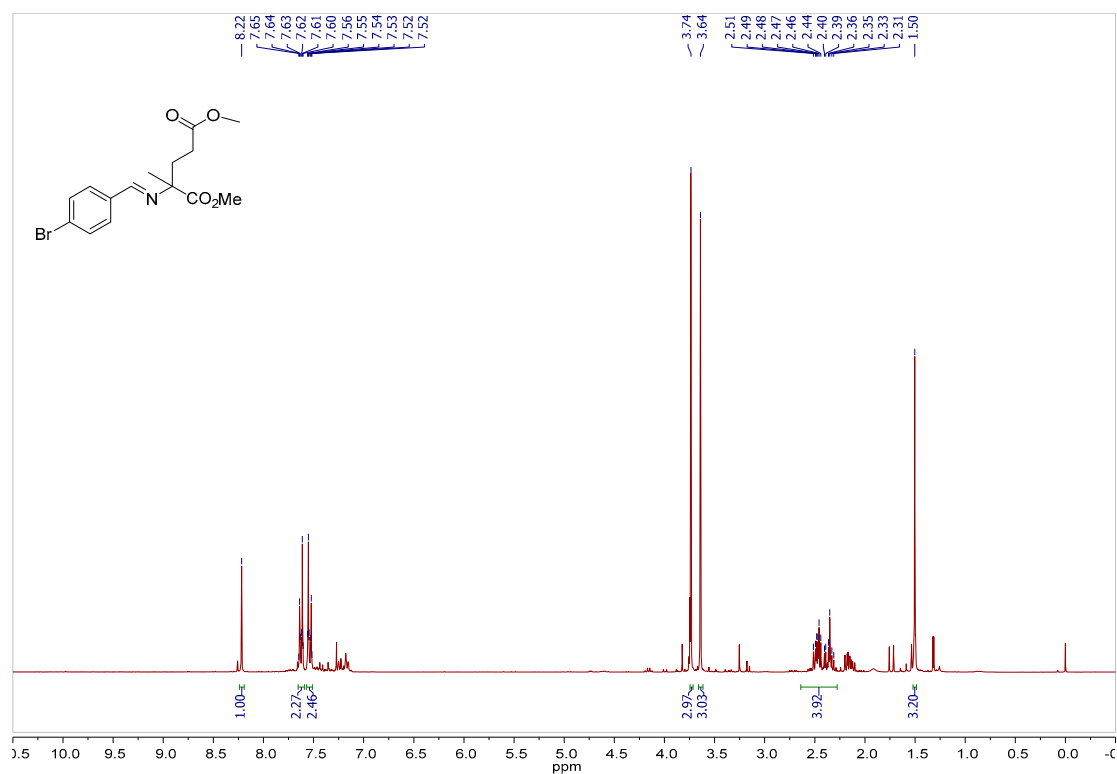

Figure S30, <sup>1</sup>H NMR of compound 2n

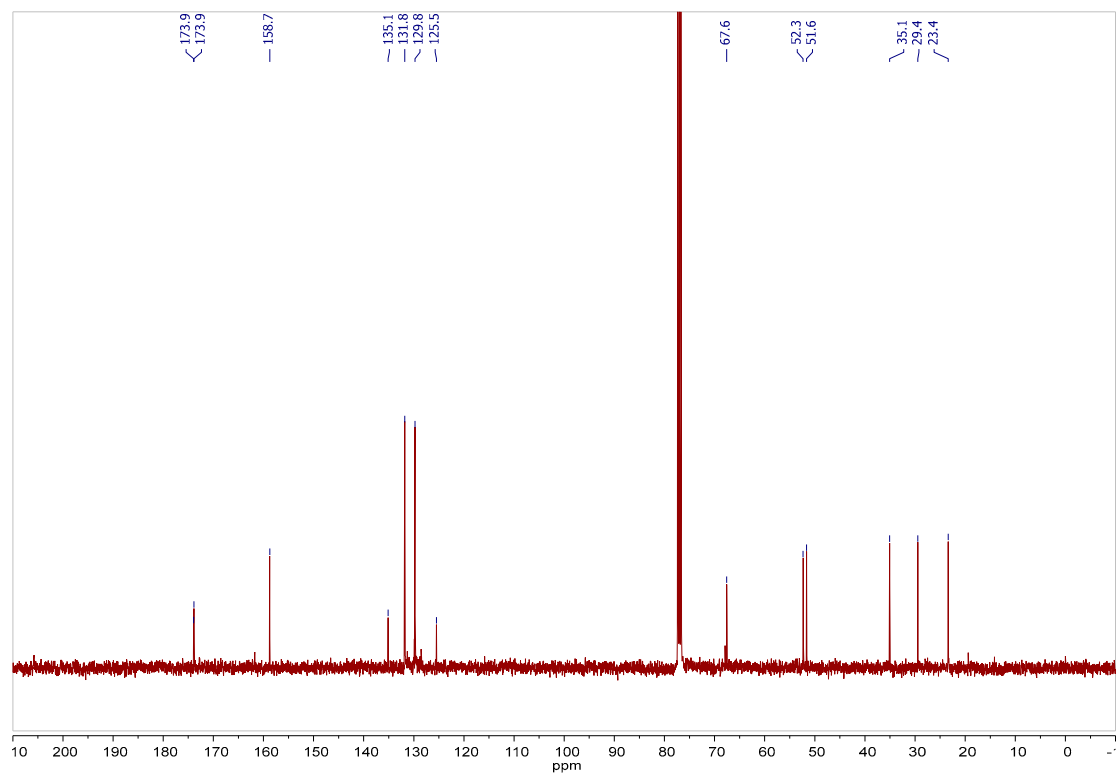

Figure S31, <sup>13</sup>C NMR of compound 2n



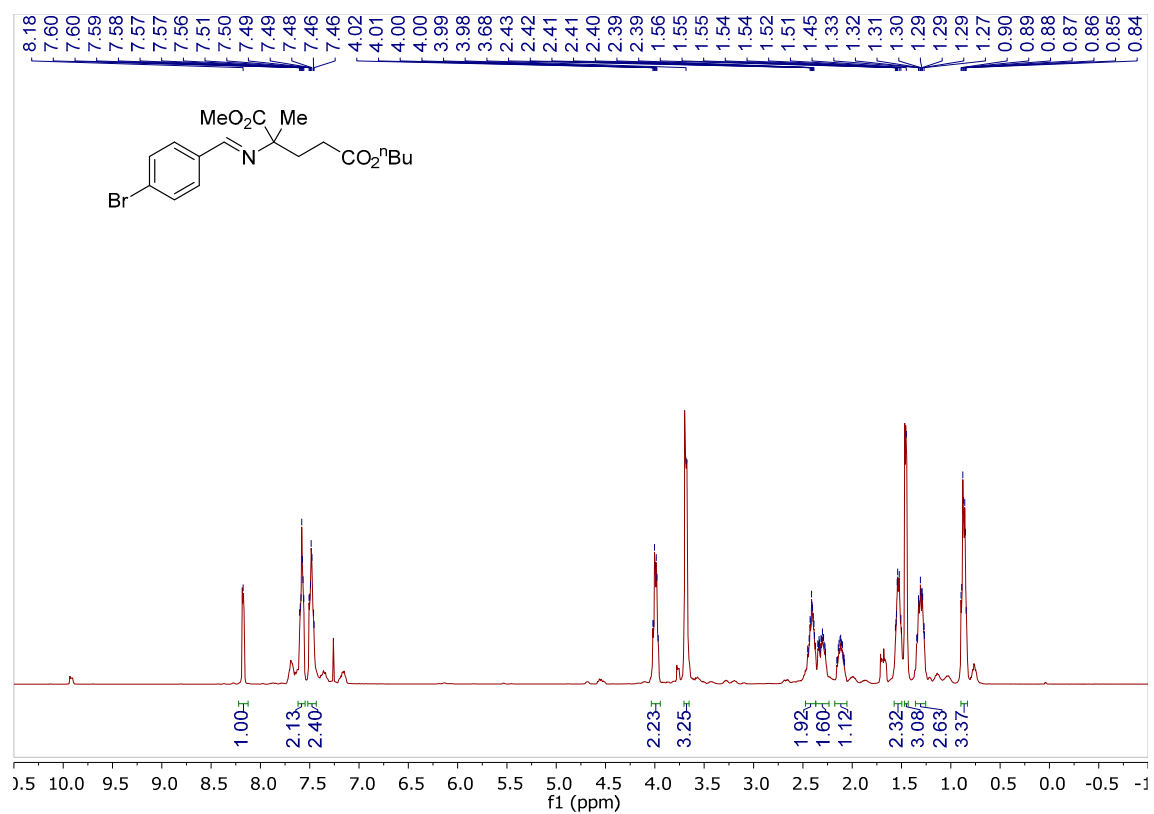

**Figure S32,** <sup>1</sup>H NMR of compound **2o**

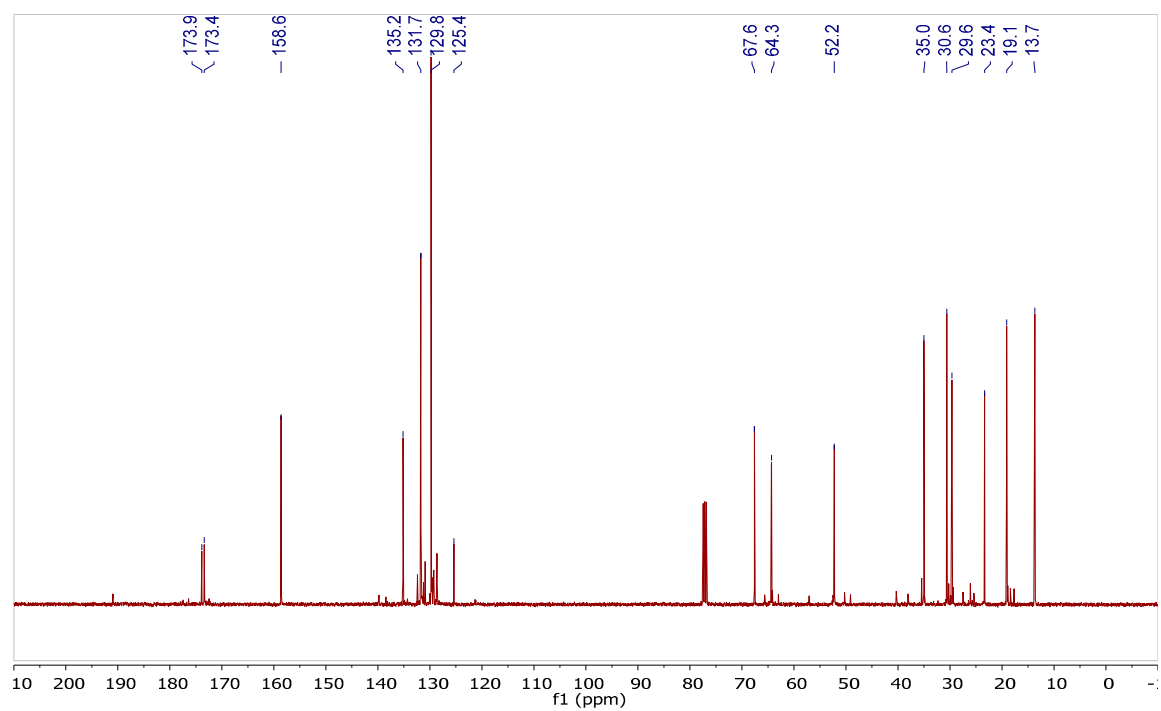

**Figure S33,** <sup>13</sup>C NMR of compound **2o**

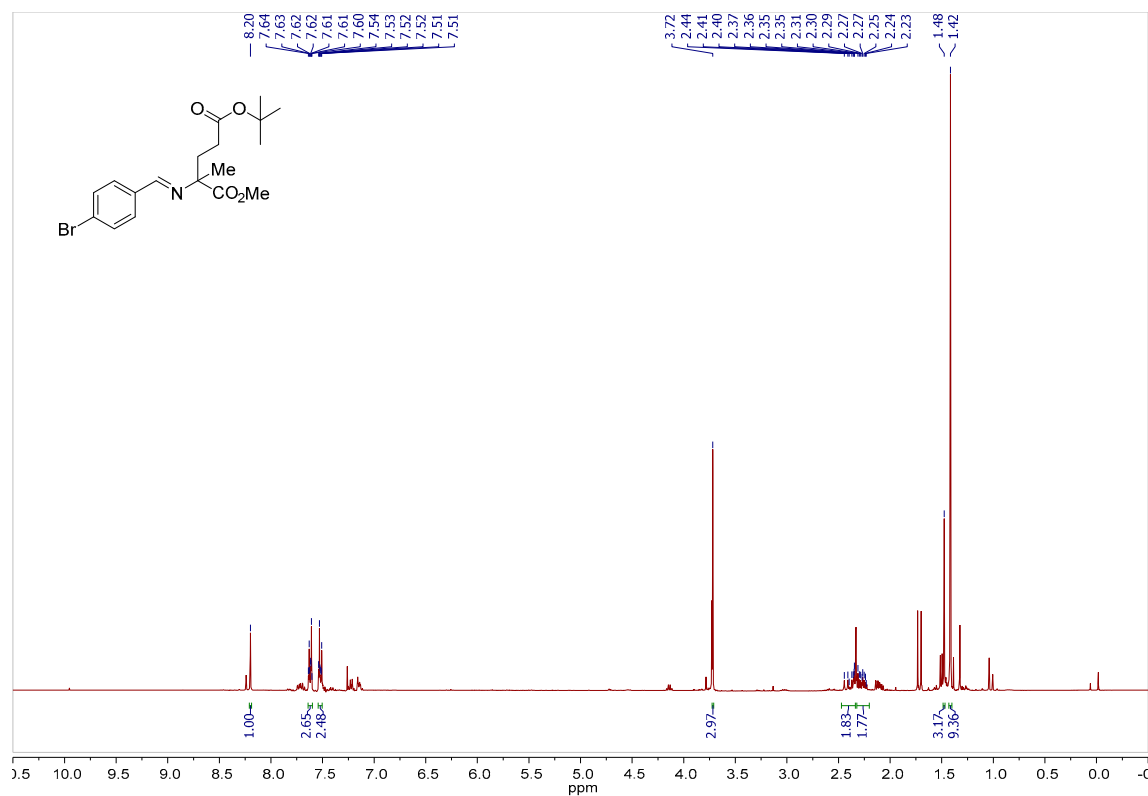

Figure S34, <sup>1</sup>H NMR of compound 2p

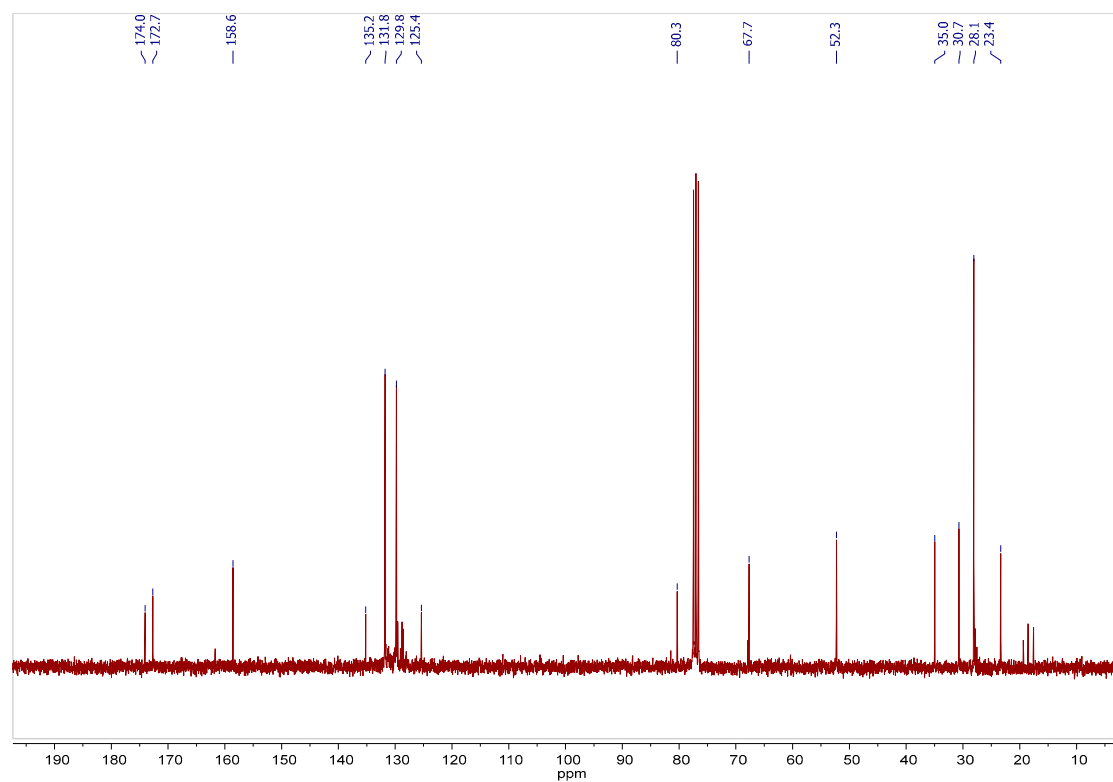

Figure S35, <sup>13</sup>C NMR of compound 2p

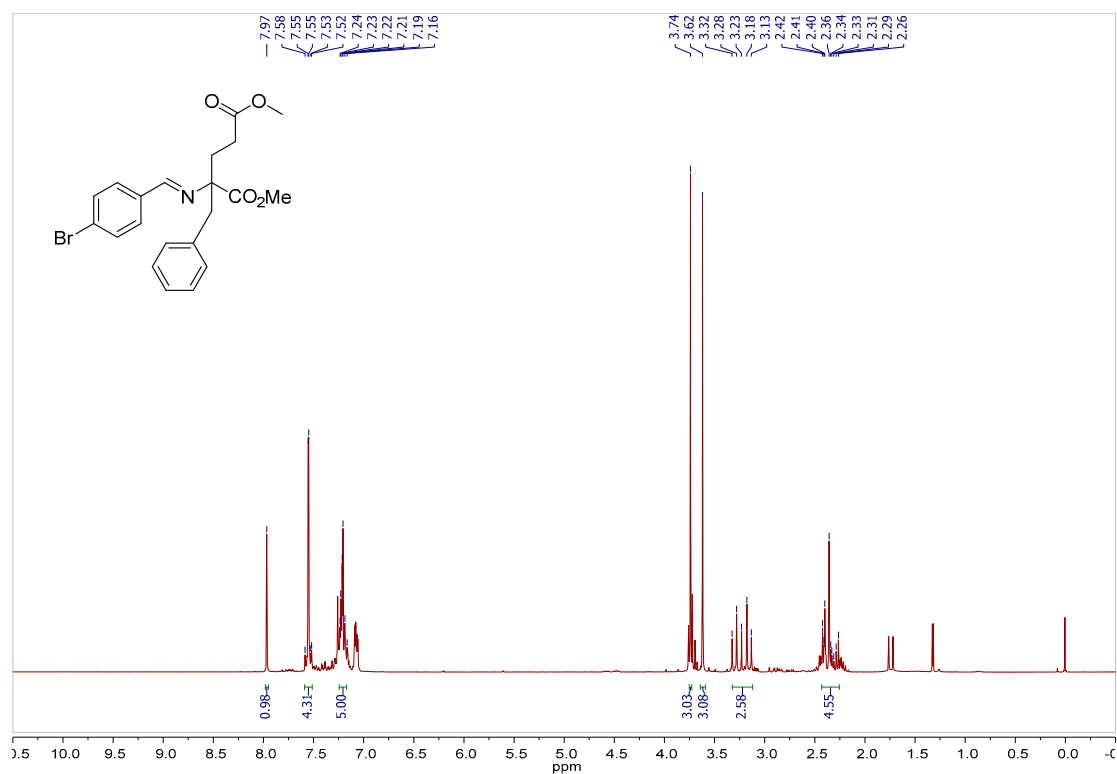

Figure S36, <sup>1</sup>H NMR of compound 2q

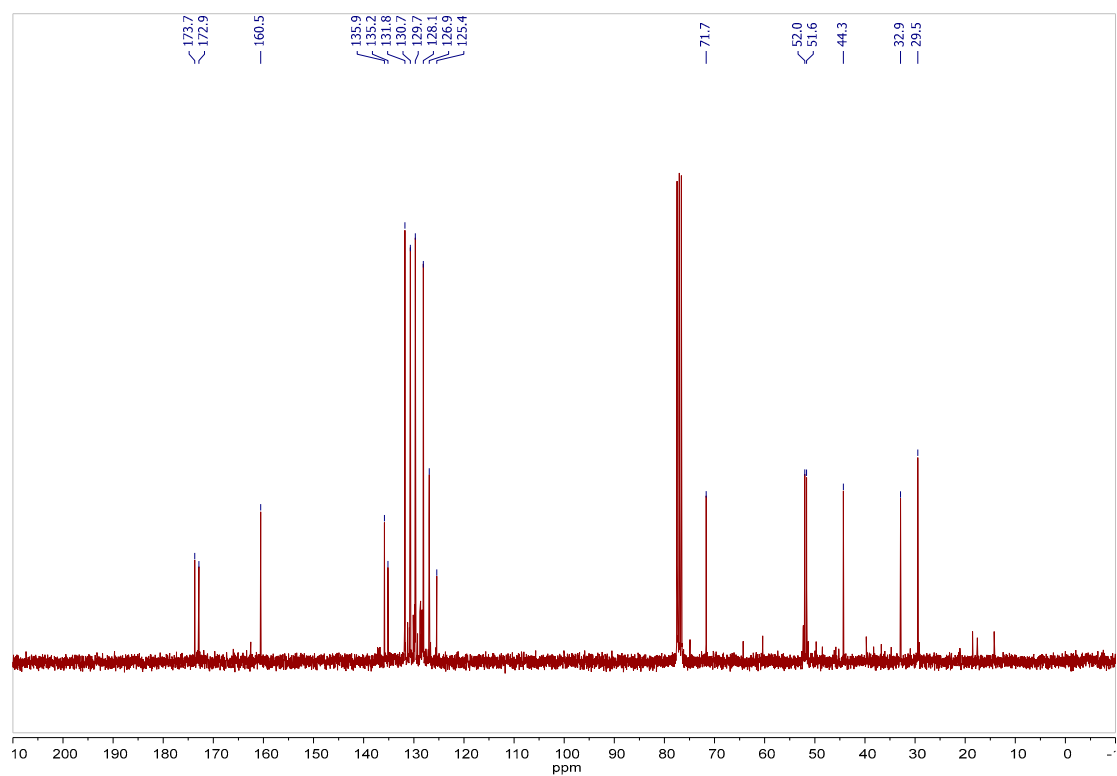

Figure S37, <sup>13</sup>C NMR of compound 2q

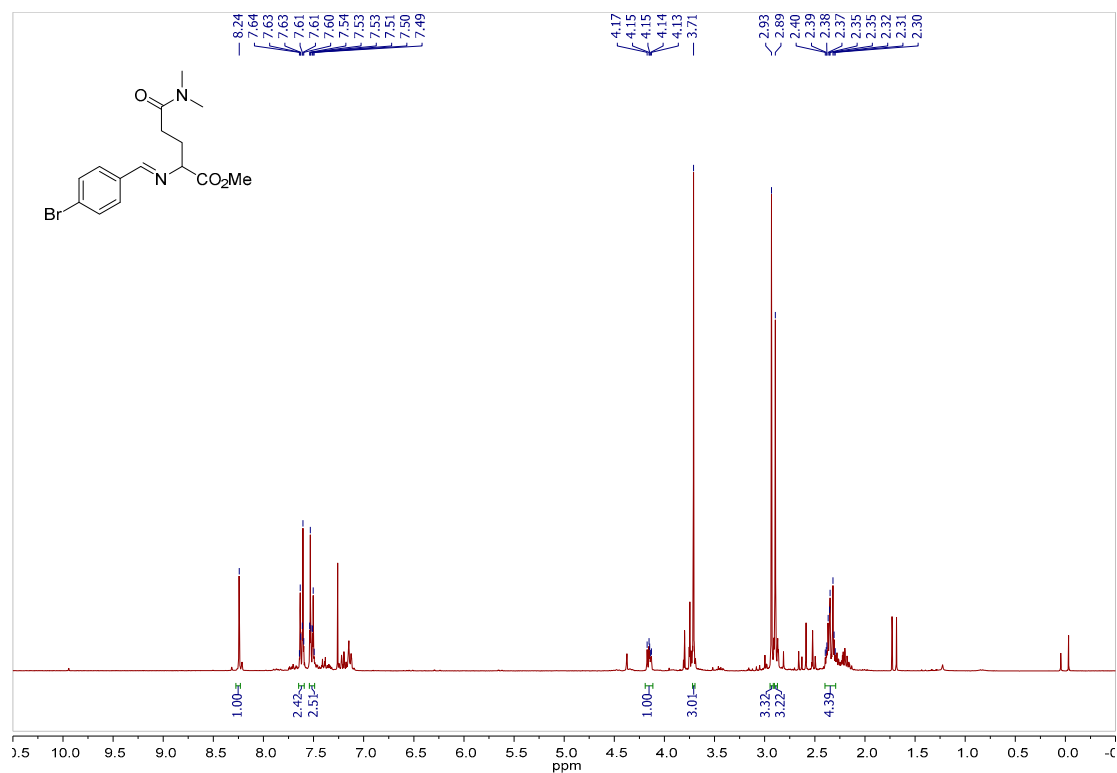

Figure S38, <sup>1</sup>H NMR of compound 2u

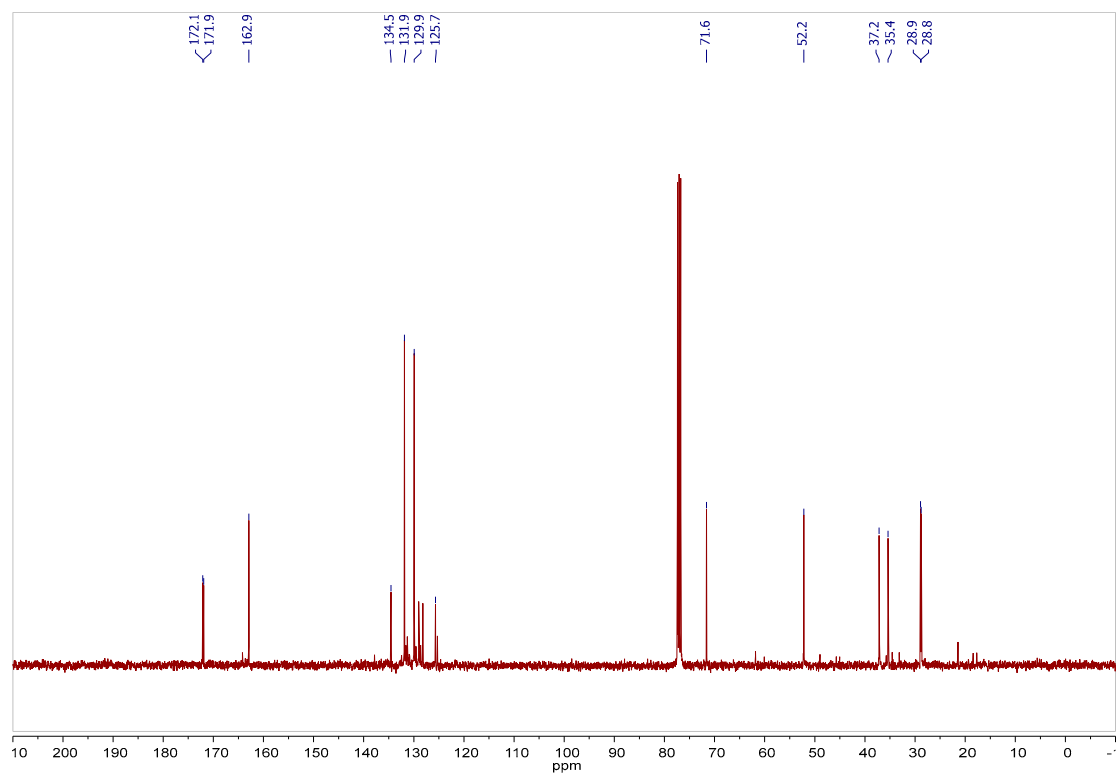

Figure S39, <sup>13</sup>C NMR of compound 2u

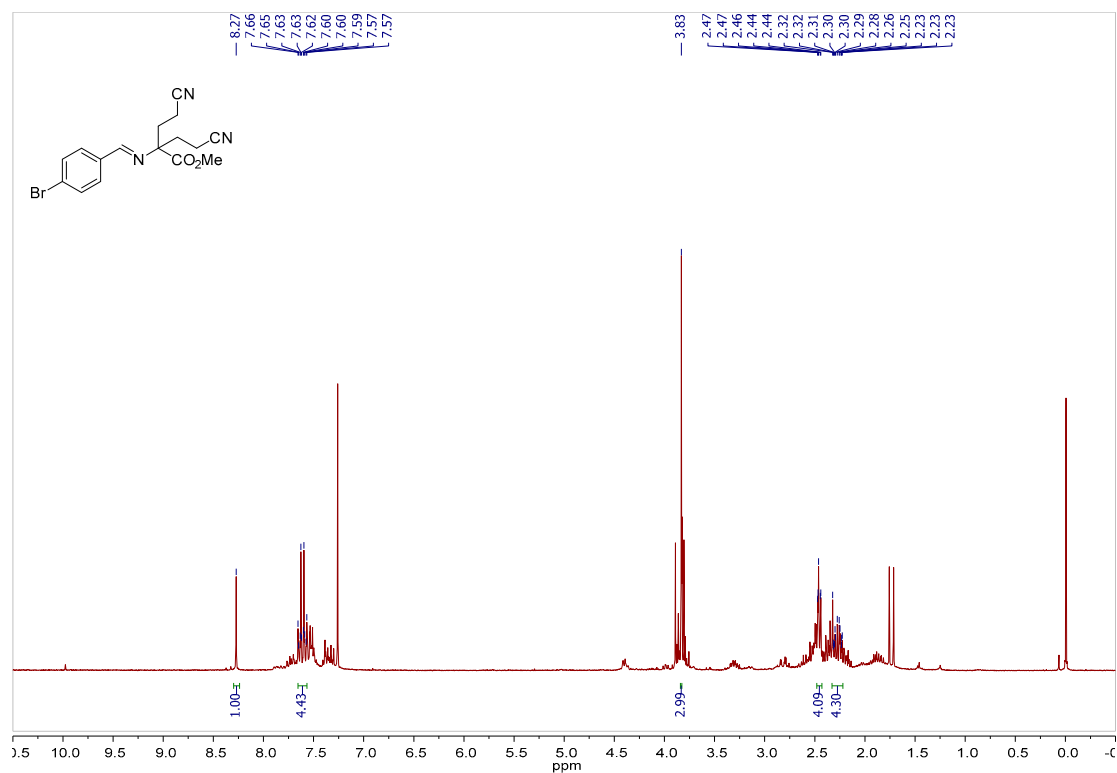

Figure S40, <sup>1</sup>H NMR of compound 6v

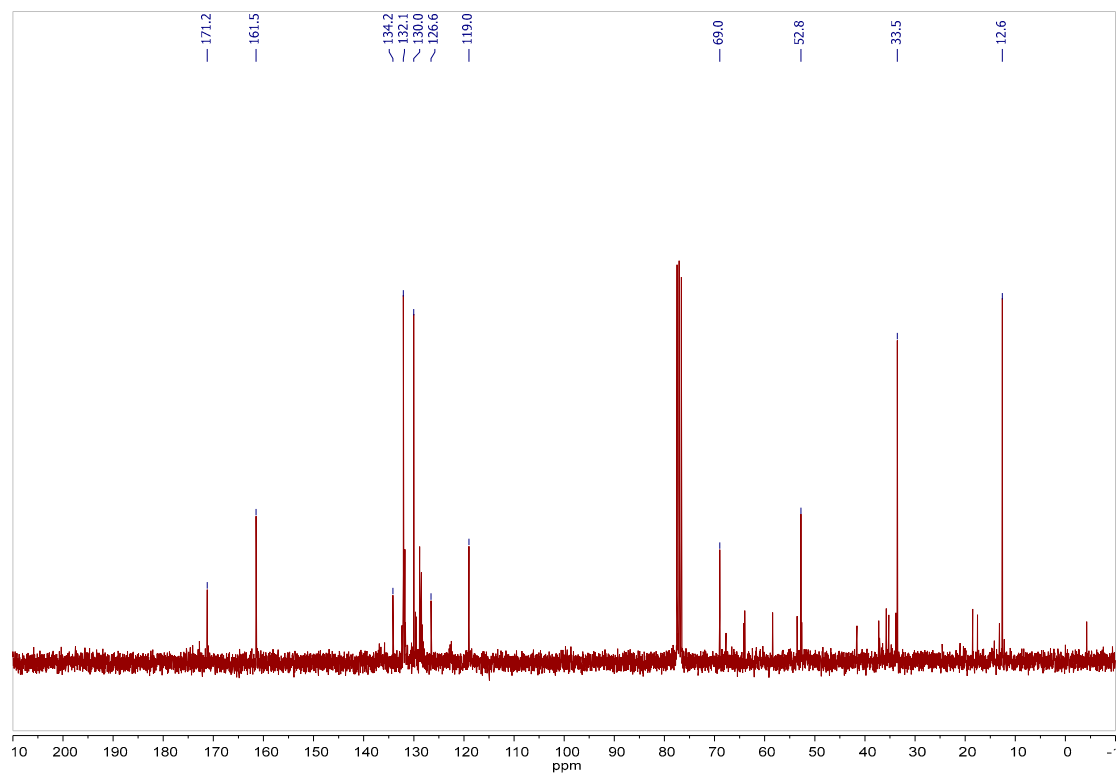

Figure S41, <sup>13</sup>C NMR of compound 6v

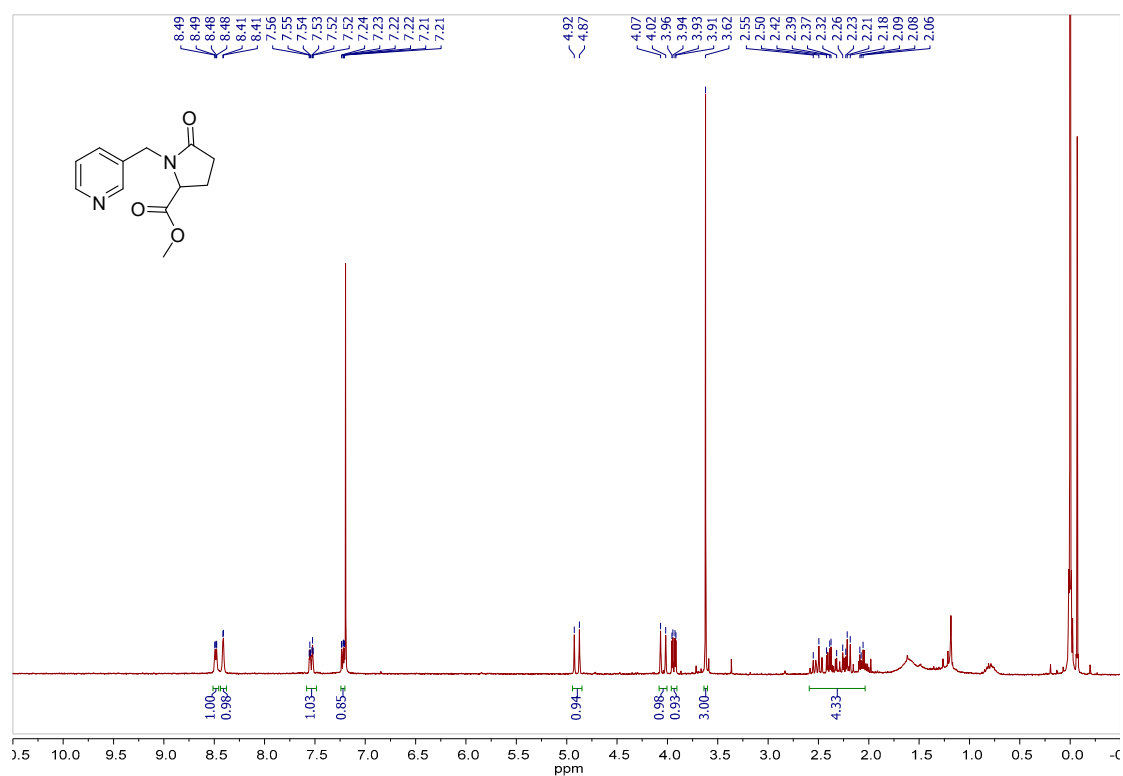

Figure S42, <sup>1</sup>H NMR of compound 8a

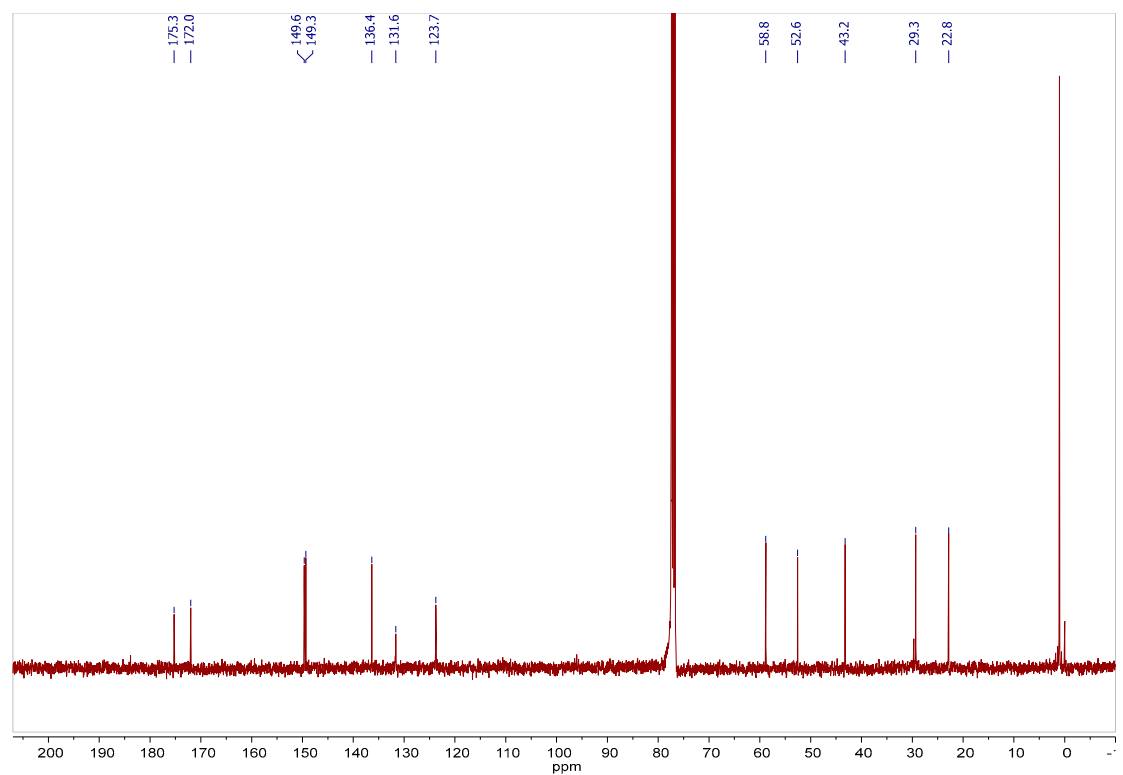

Figure S43, <sup>13</sup>C NMR of compound 8a

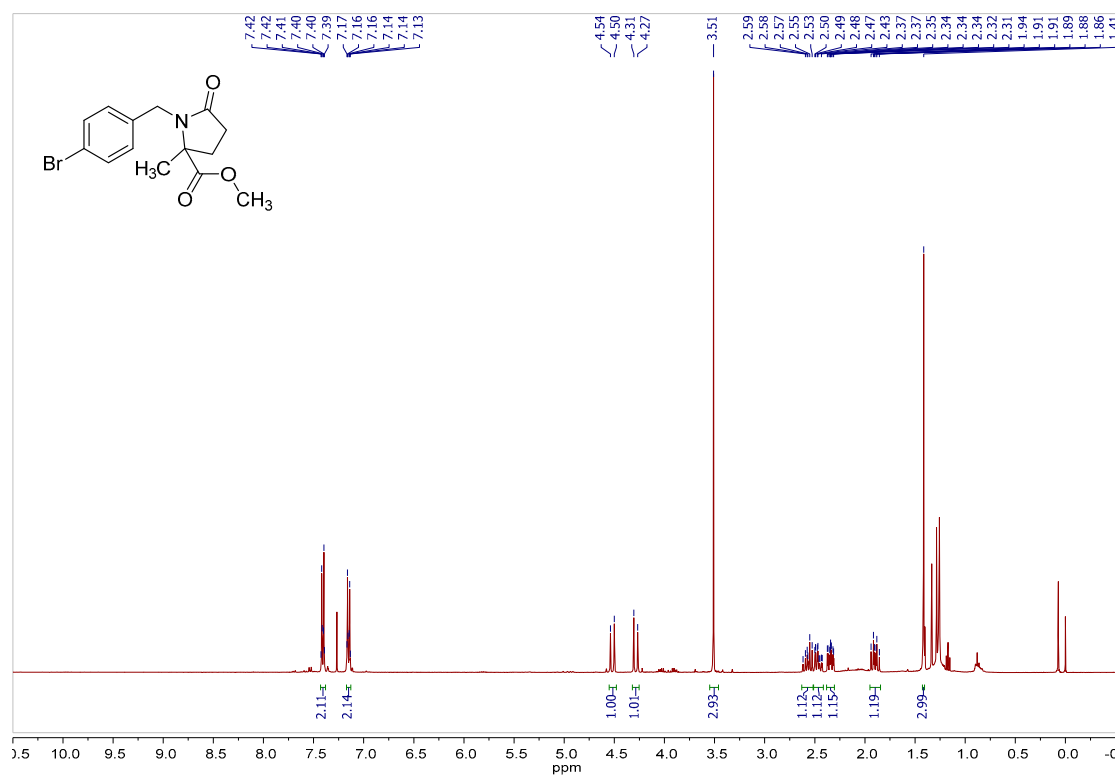

**Figure S44,** <sup>1</sup>H NMR of compound **8b**

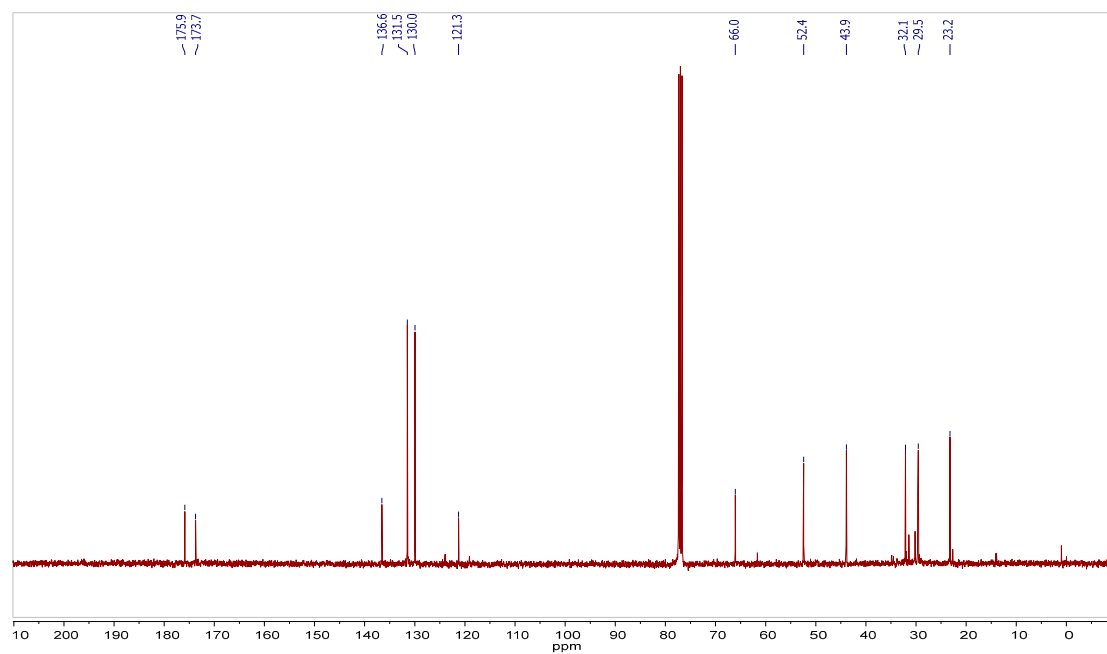

**Figure S45,** <sup>13</sup>C NMR of compound **8b**

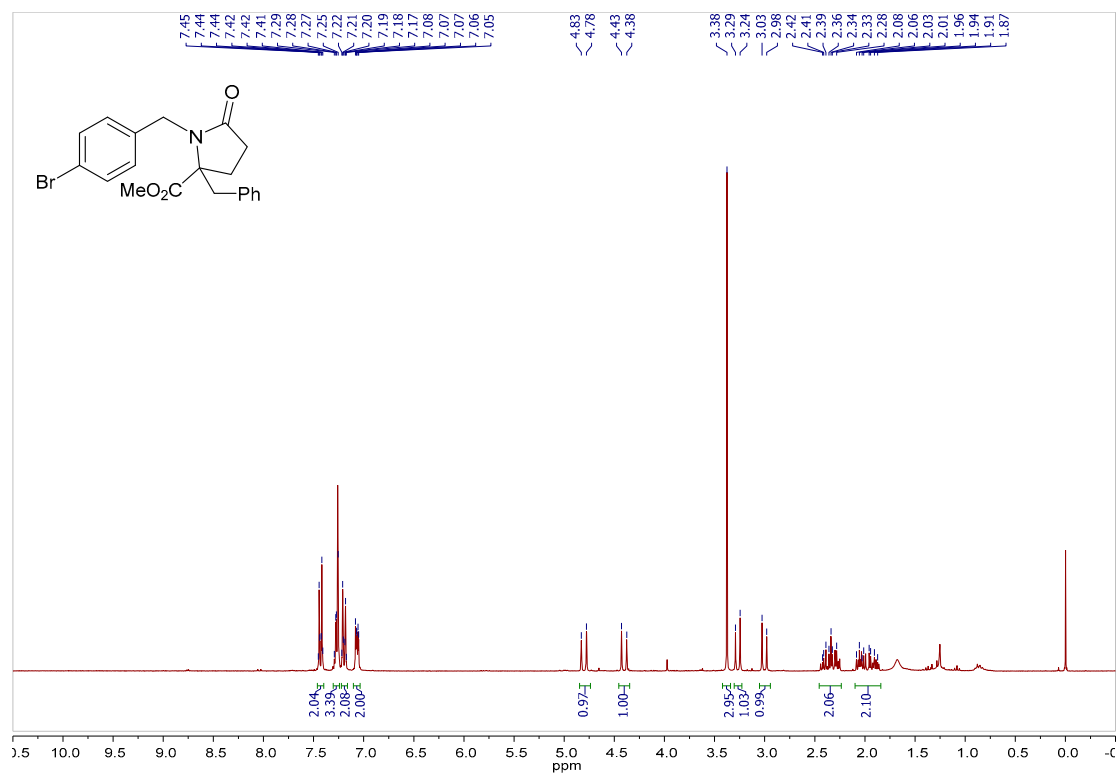

Figure S46, <sup>1</sup>H NMR of compound 8c

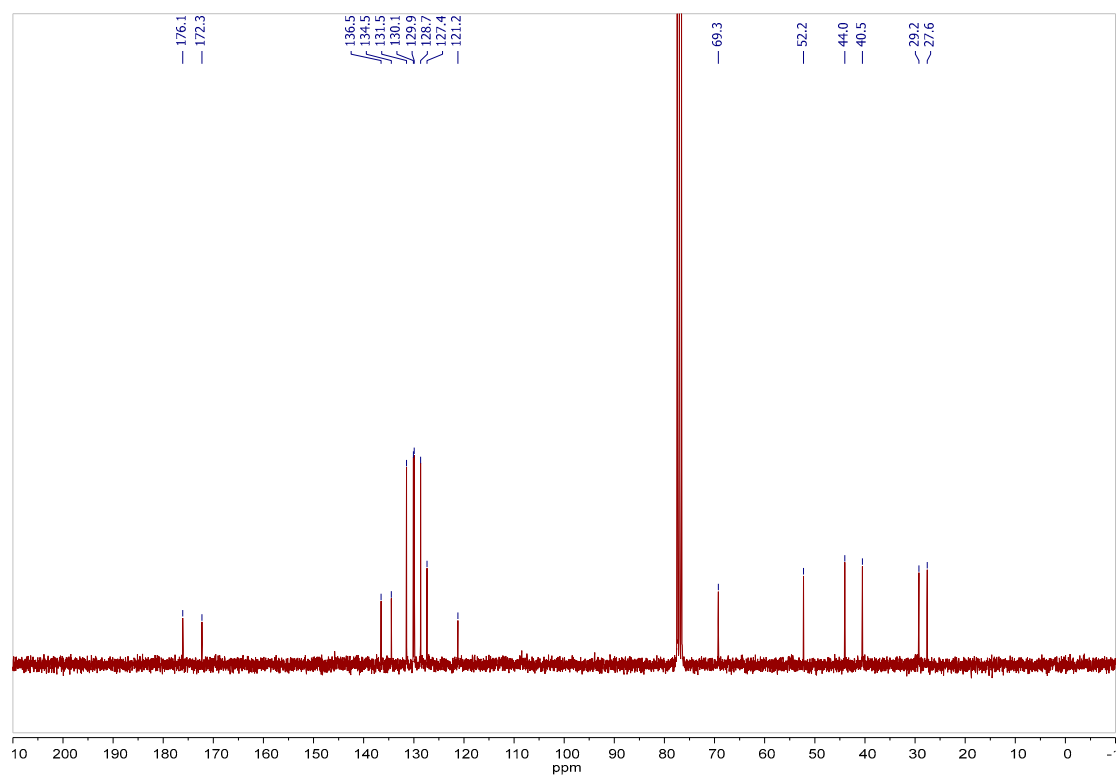

Figure S47, <sup>13</sup>C NMR of compound 8c



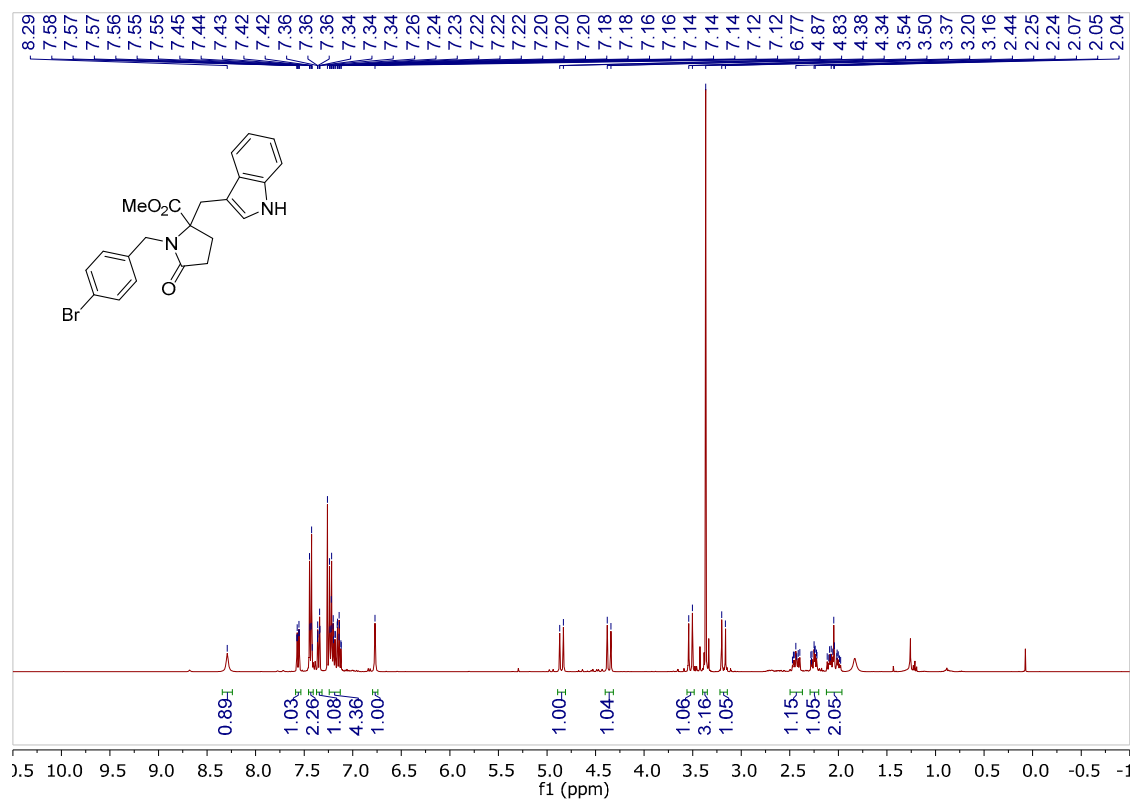

**Figure S48, <sup>1</sup>H NMR of compound 8d**

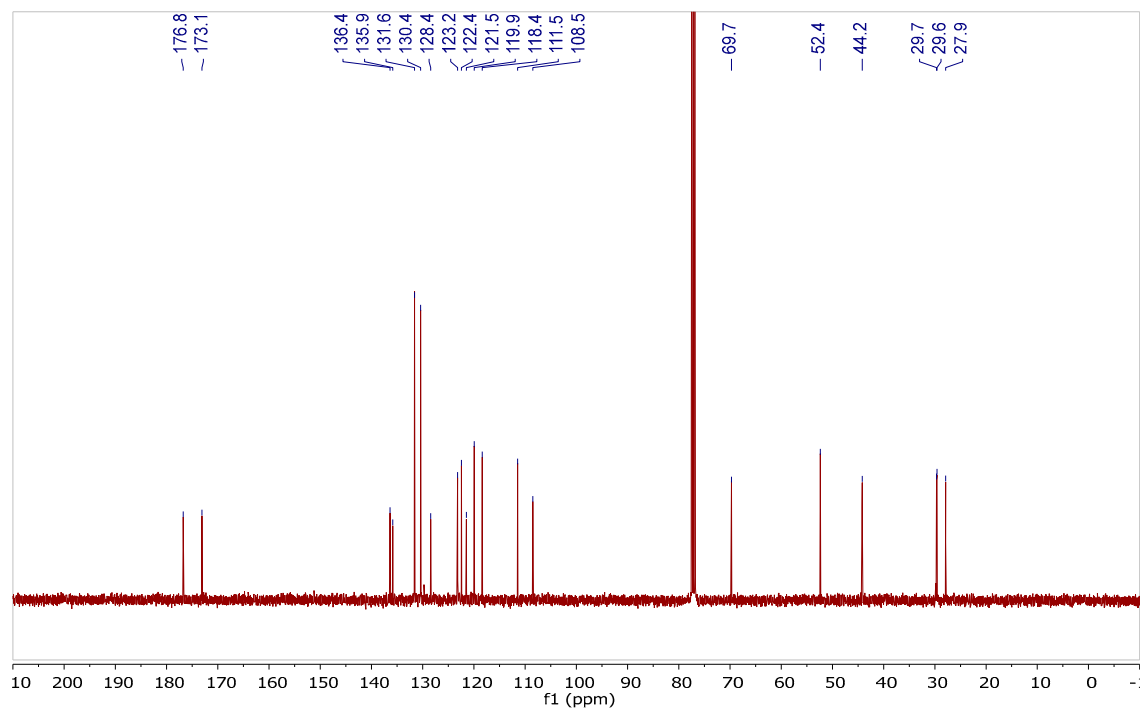

**Figure S49, <sup>13</sup>C NMR of compound 8d**

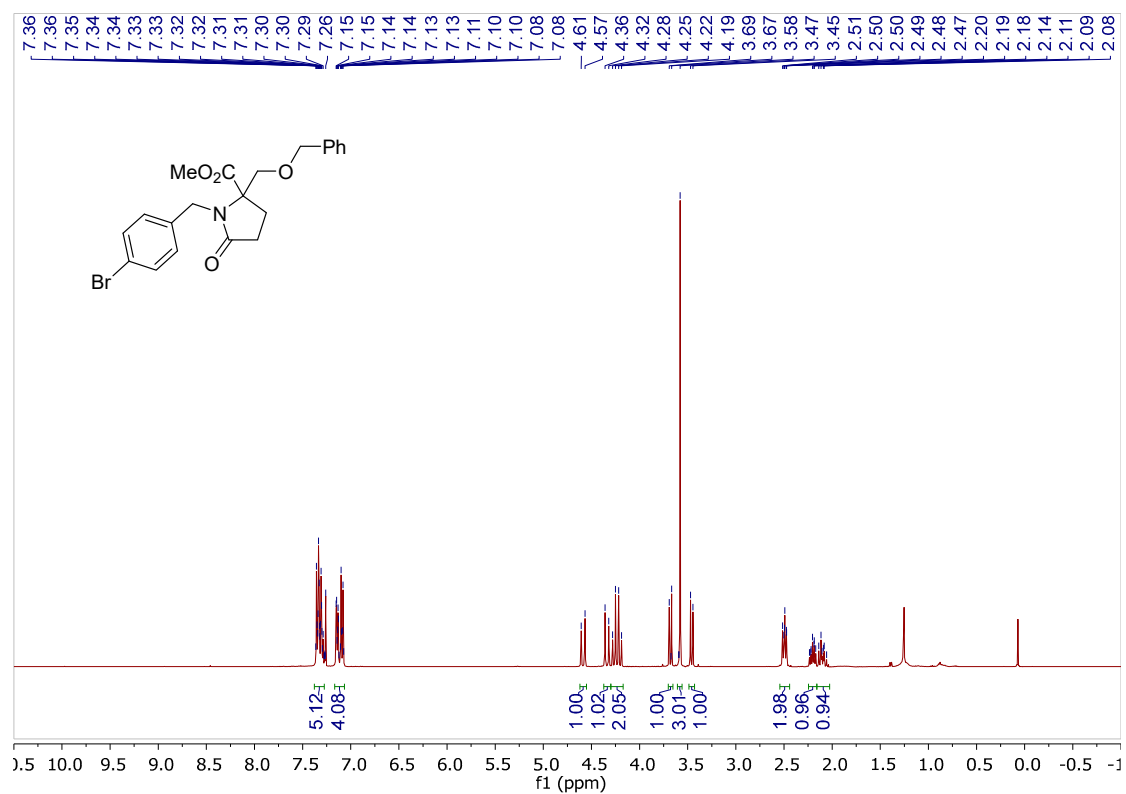

**Figure S50**, <sup>1</sup>H NMR of compound **8e**

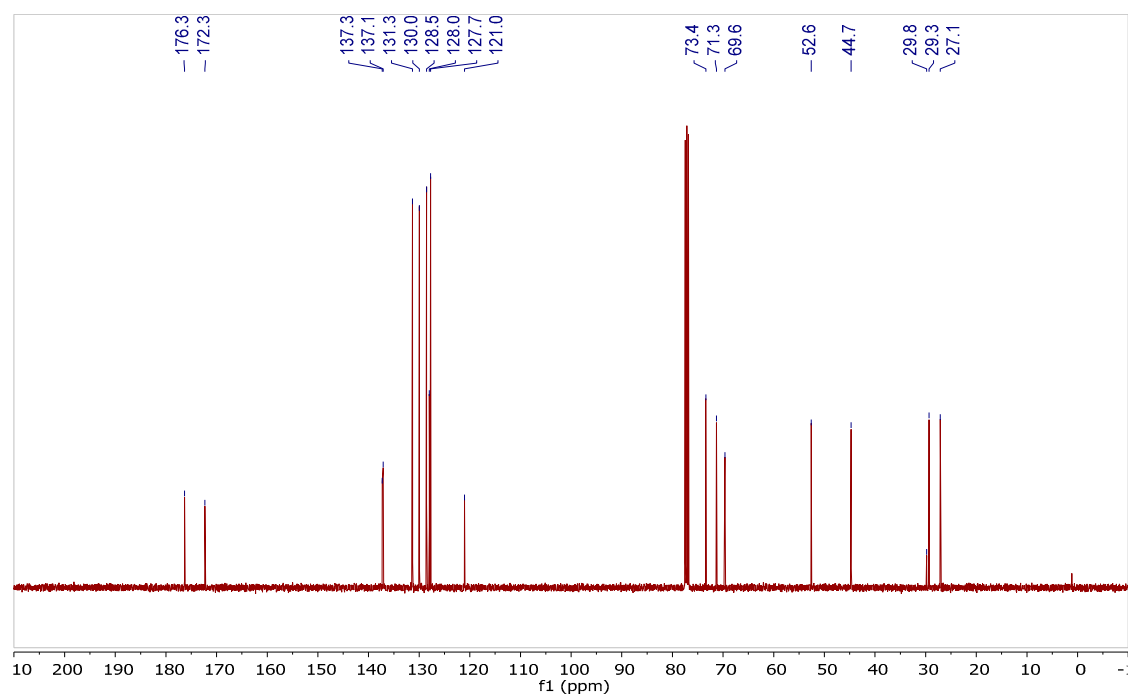

**Figure S51**, <sup>13</sup>C NMR of compound **8e**

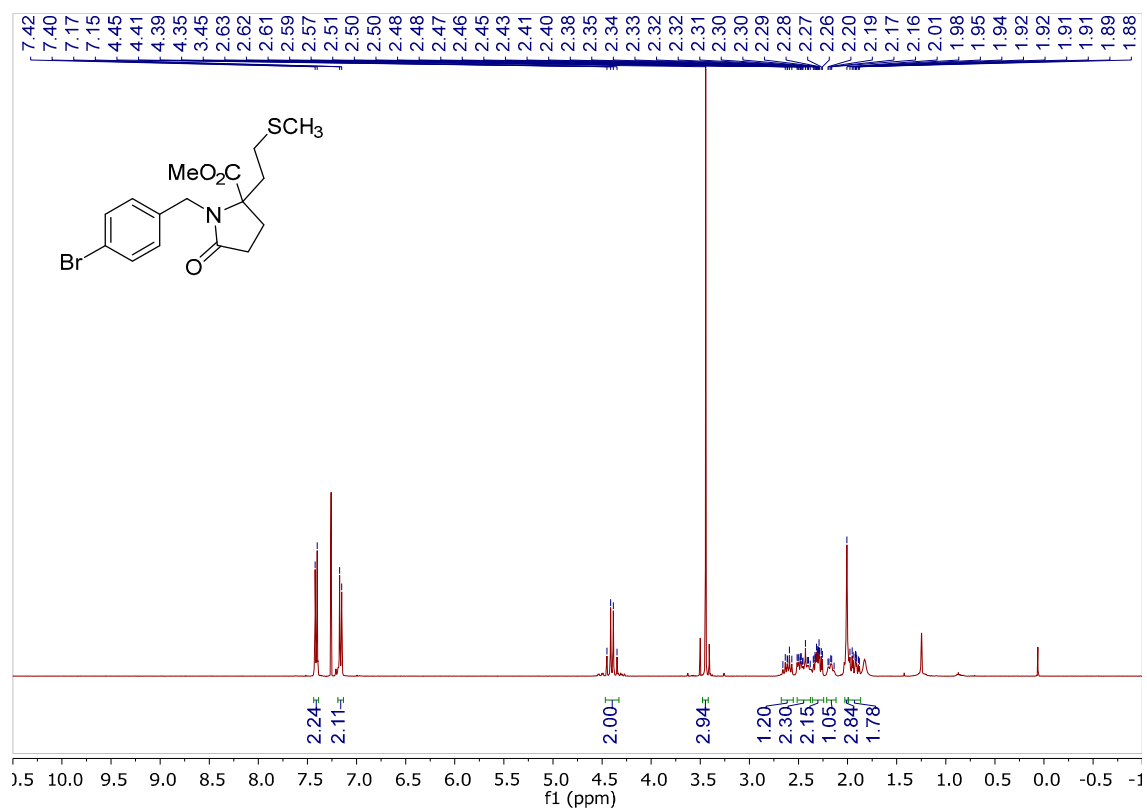

Figure S52, <sup>1</sup>H NMR of compound 8f

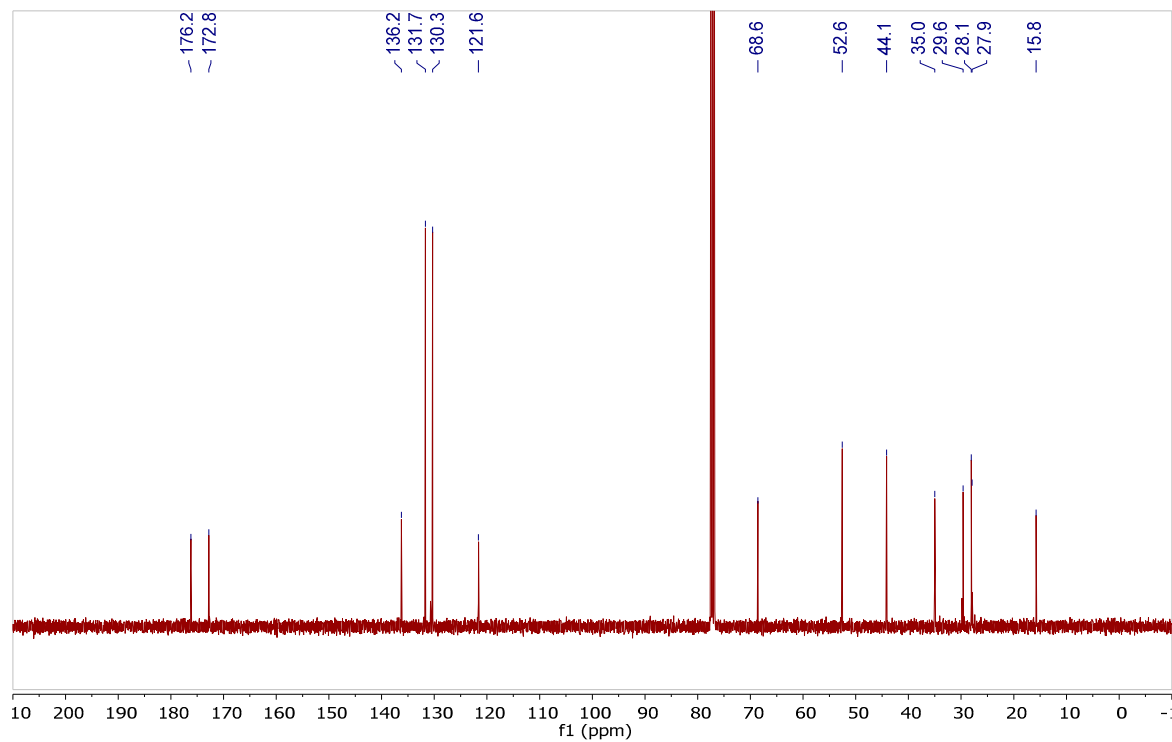

Figure S53, <sup>13</sup>C NMR of compound 8f

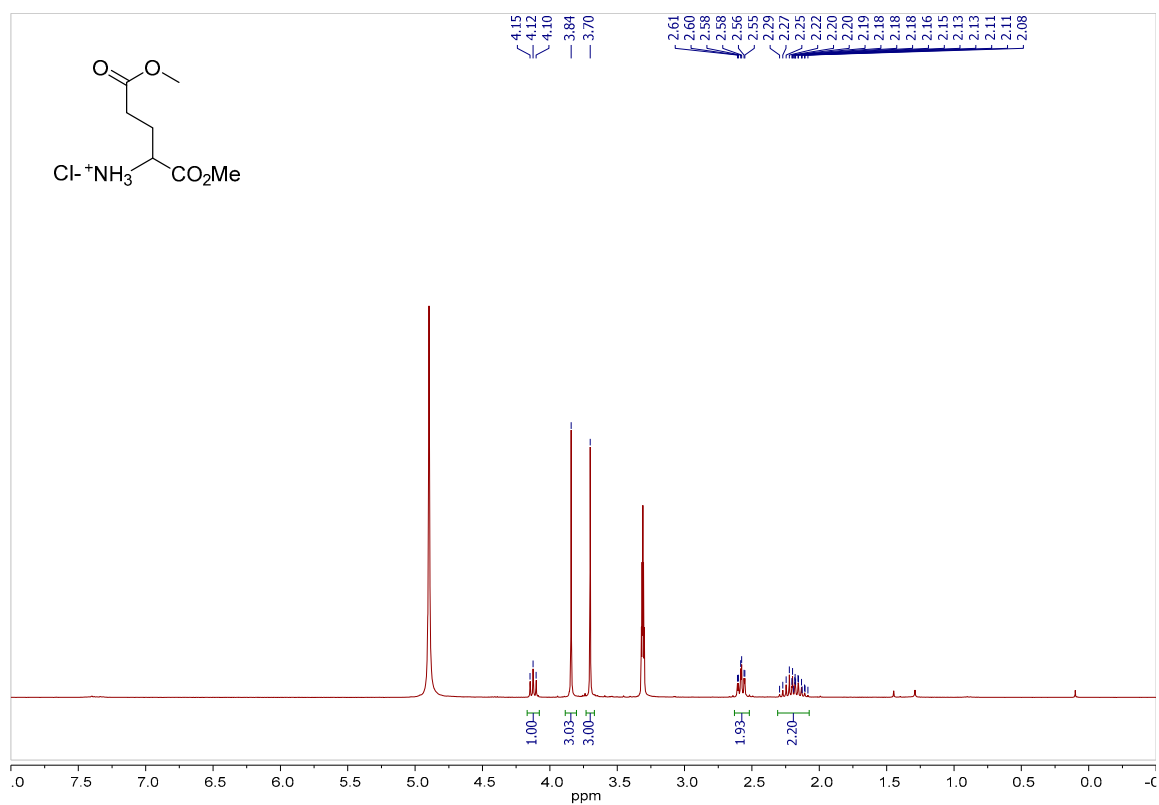

Figure S54, <sup>1</sup>H NMR of compound 9

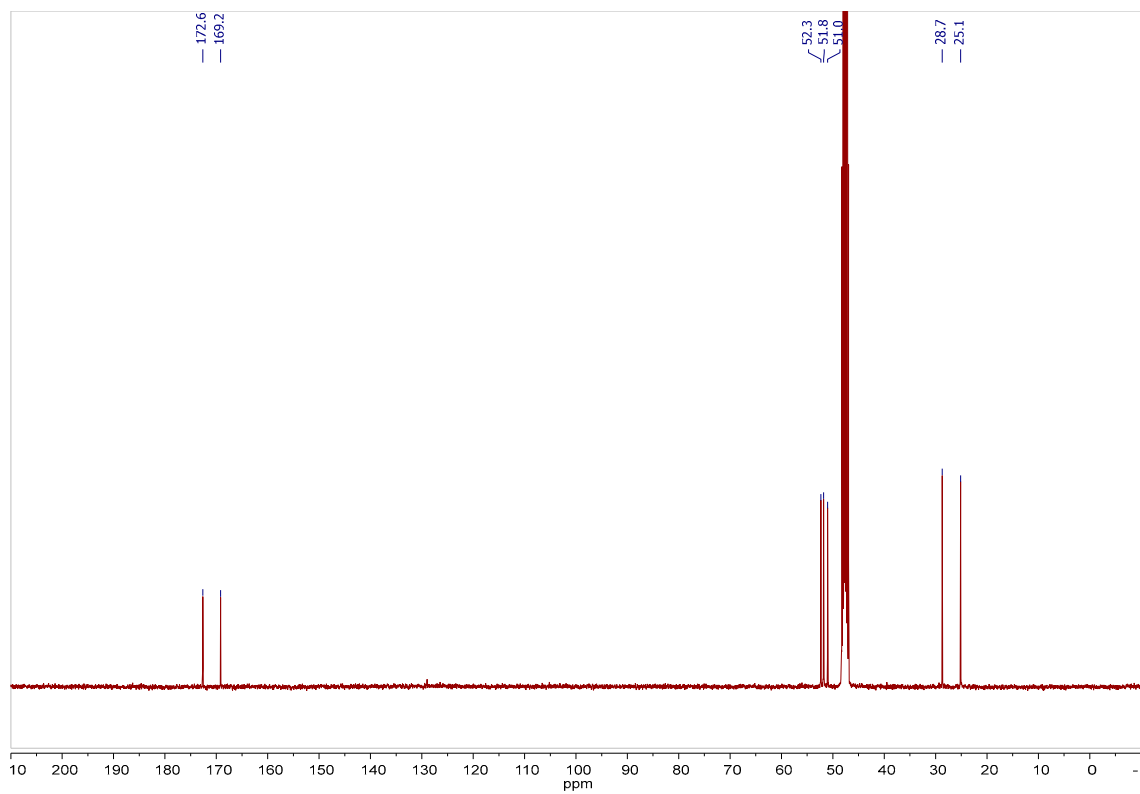

Figure S55, <sup>13</sup>C NMR of compound 9

## 2. REPRESENTATIVE FTIR COPIES

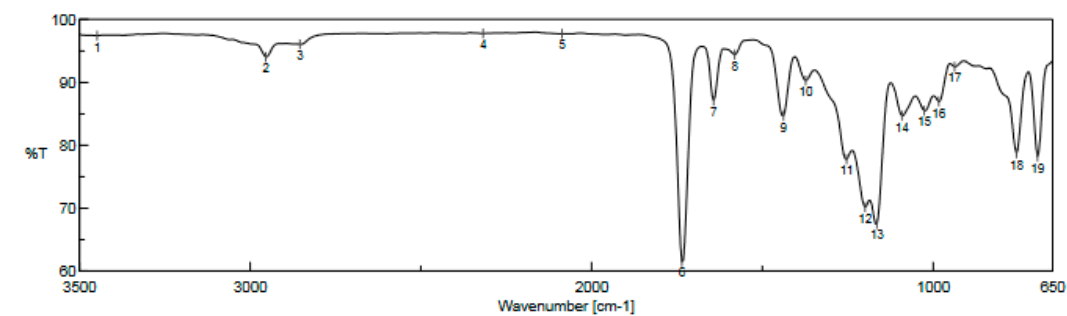

[Comments]  
Sample name  
Comment  
User  
Division  
Company Universidad de Alicante

| [ Result of Peak Picking ] |          |           |     |          |           |     |          |           |    |         |       |
|----------------------------|----------|-----------|-----|----------|-----------|-----|----------|-----------|----|---------|-------|
| No.                        | Position | Intensity | No. | Position | Intensity | No. | Position | Intensity |    |         |       |
| 1                          | 3448.1   | 97.42     | 2   | 2954.41  | 94.01     | 3   | 2854.13  | 96.03     | 4  | 2318.02 | 97.75 |
| 5                          | 2086.6   | 97.89     | 6   | 1735.62  | 61.49     | 7   | 1643.05  | 87.07     | 8  | 1581.34 | 94.40 |
| 9                          | 1438.64  | 84.86     | 10  | 1373.07  | 90.29     | 11  | 1253.5   | 77.73     | 12 | 1199.51 | 70.17 |
| 13                         | 1164.79  | 67.48     | 14  | 1091.51  | 84.69     | 15  | 1025.94  | 85.47     | 16 | 983.518 | 86.92 |
| 17                         | 937.235  | 92.48     | 18  | 755.959  | 78.72     | 19  | 694.248  | 78.19     |    |         |       |

Figure S56, FTIR of compound 2a

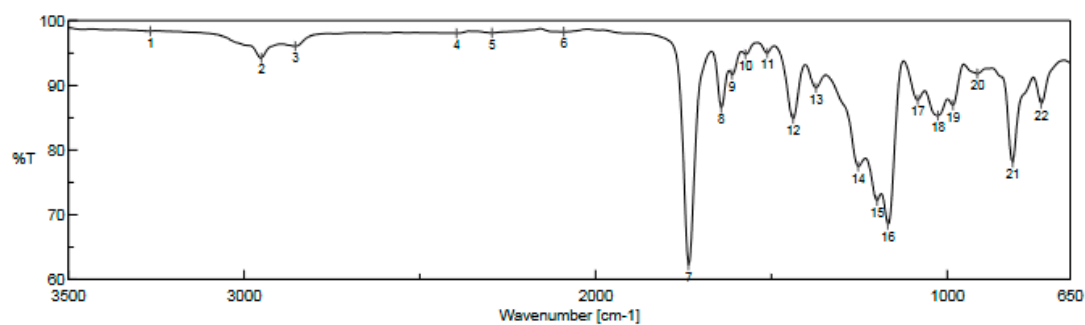

[Comments]  
Sample name  
Comment  
User  
Division  
Company Universidad de Alicante

| [ Result of Peak Picking ] |          |           |     |          |           |     |          |           |     |          |           |
|----------------------------|----------|-----------|-----|----------|-----------|-----|----------|-----------|-----|----------|-----------|
| No.                        | Position | Intensity | No. | Position | Intensity | No. | Position | Intensity | No. | Position | Intensity |
| 1                          | 3266.82  | 98.37     | 2   | 2950.55  | 94.22     | 3   | 2854.13  | 96.04     | 4   | 2395.16  | 98.06     |
| 5                          | 2294.88  | 98.10     | 6   | 2090.46  | 98.24     | 7   | 1735.62  | 62.22     | 8   | 1643.05  | 86.50     |
| 9                          | 1612.2   | 91.66     | 10  | 1573.63  | 94.80     | 11  | 1511.92  | 94.98     | 12  | 1438.64  | 84.80     |
| 13                         | 1373.07  | 89.60     | 14  | 1253.5   | 77.45     | 15  | 1199.51  | 72.14     | 16  | 1168.65  | 68.48     |
| 17                         | 1083.8   | 87.71     | 18  | 1025.94  | 85.30     | 19  | 983.518  | 86.92     | 20  | 914.093  | 91.80     |
| 21                         | 813.813  | 78.08     | 22  | 732.817  | 87.17     |     |          |           |     |          |           |

Figure S57, FTIR of compound 2b

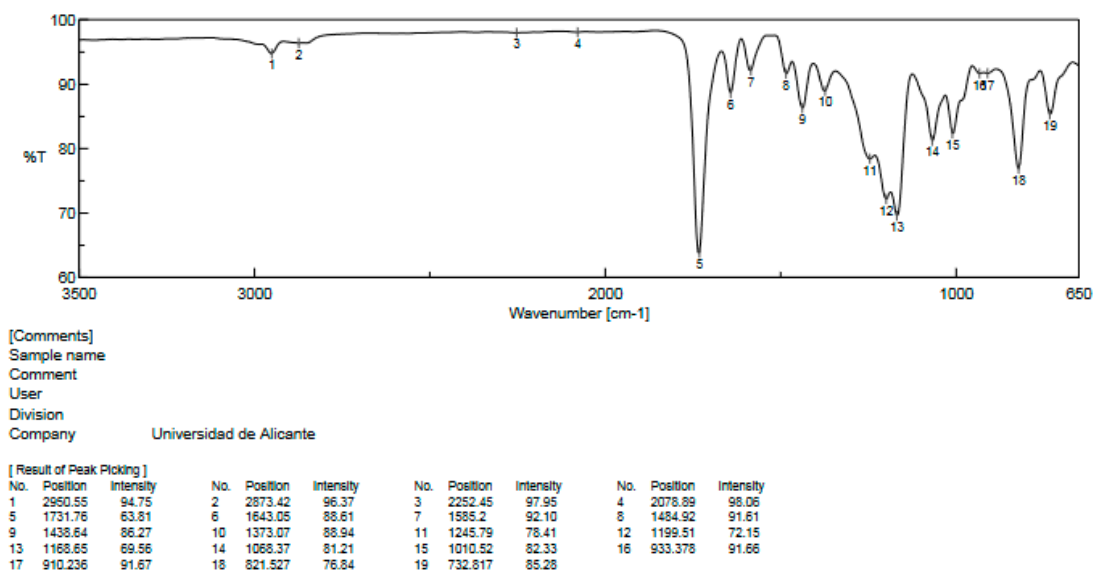

Figure S58, FTIR of compound 2g

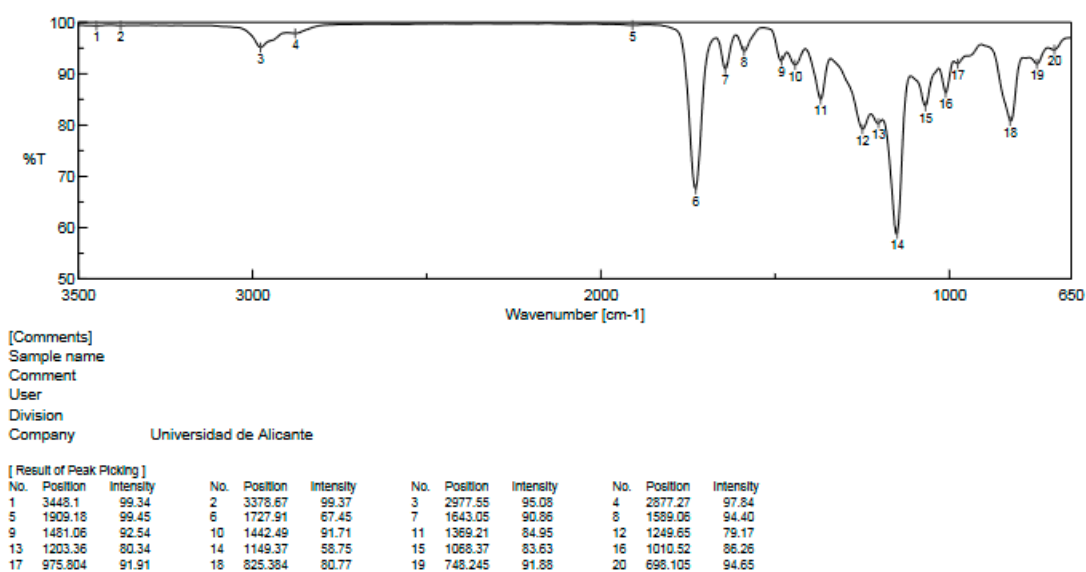

Figure S59, FTIR of compound 2h

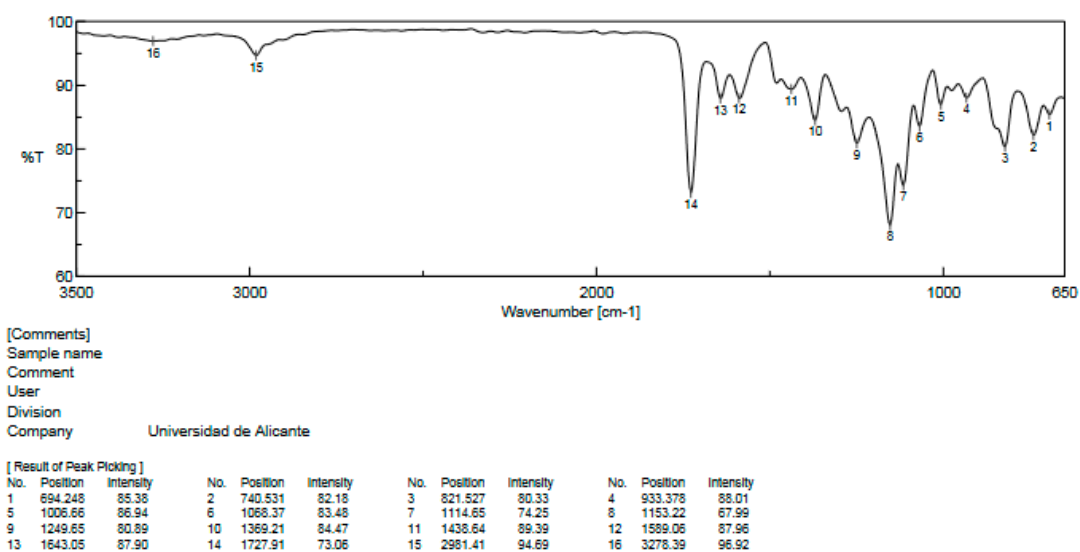

**Figure S60**, FTIR of compound **2m**

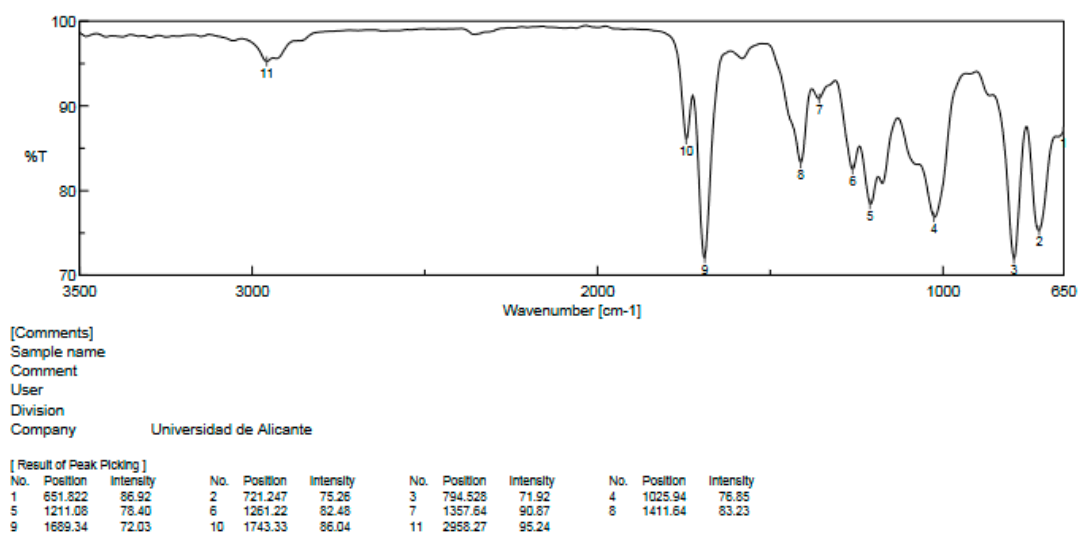

**Figure S61**, FTIR of compound **8a**

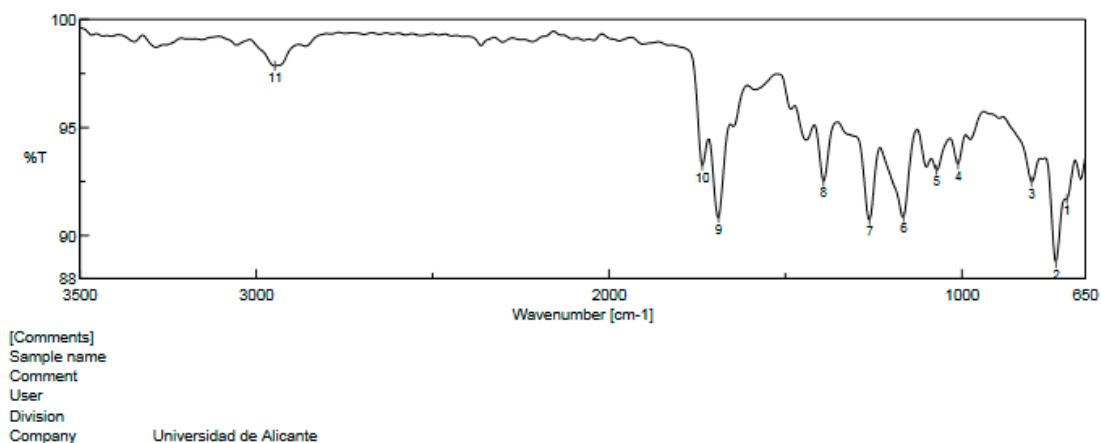

| [ Result of Peak Picking ] |          |           |     |          |           |     |          |           |     |          |           |
|----------------------------|----------|-----------|-----|----------|-----------|-----|----------|-----------|-----|----------|-----------|
| No.                        | Position | Intensity | No. | Position | Intensity | No. | Position | Intensity | No. | Position | Intensity |
| 1                          | 701.962  | 91.68     | 2   | 732.817  | 88.73     | 3   | 802.242  | 92.49     | 4   | 1010.52  | 93.30     |
| 5                          | 1072.23  | 93.02     | 6   | 1164.79  | 90.86     | 7   | 1261.22  | 90.69     | 8   | 1392.35  | 92.50     |
| 9                          | 1689.34  | 90.81     | 10  | 1735.62  | 93.24     | 11  | 2946.7   | 97.86     |     |          |           |

**Figure S62, FTIR of compound 8b**

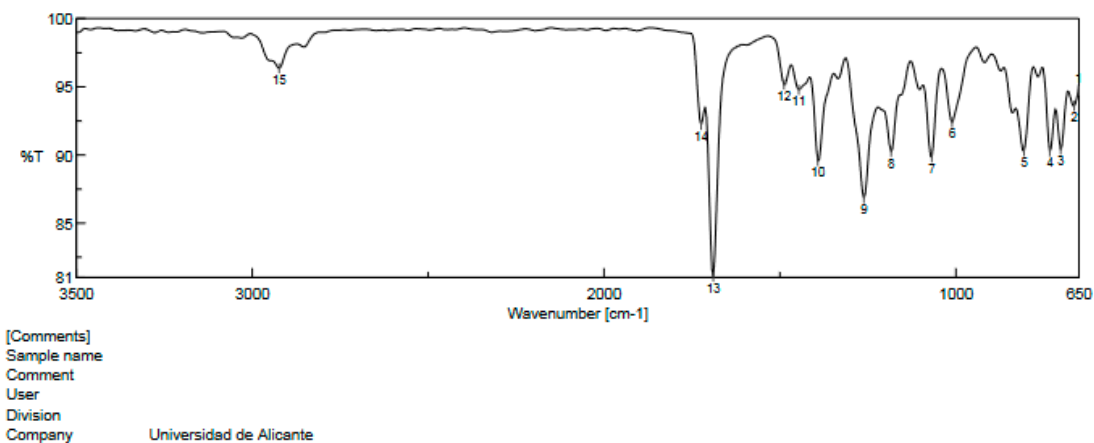

| [ Result of Peak Picking ] |          |           |     |          |           |     |          |           |     |          |           |
|----------------------------|----------|-----------|-----|----------|-----------|-----|----------|-----------|-----|----------|-----------|
| No.                        | Position | Intensity | No. | Position | Intensity | No. | Position | Intensity | No. | Position | Intensity |
| 1                          | 651.822  | 94.70     | 2   | 663.393  | 93.59     | 3   | 701.962  | 90.38     | 4   | 732.817  | 90.25     |
| 5                          | 806.099  | 90.26     | 6   | 1010.52  | 92.39     | 7   | 1068.37  | 89.81     | 8   | 1184.08  | 90.22     |
| 9                          | 1261.22  | 86.81     | 10  | 1392.35  | 89.54     | 11  | 1446.35  | 94.78     | 12  | 1488.78  | 95.16     |
| 13                         | 1689.34  | 81.06     | 14  | 1724.05  | 92.19     | 15  | 2923.56  | 96.35     |     |          |           |

**Figure S63, FTIR of compound 8c**



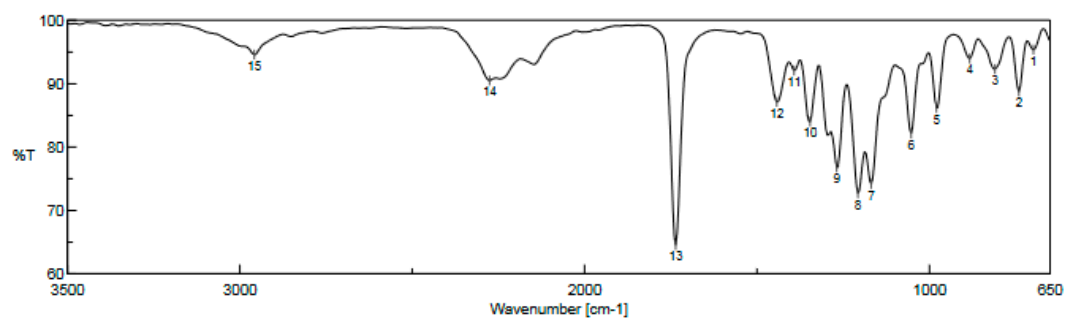

[Comments]

Sample name

Comment

User

Division

Company Universidad de Alicante

[Result of Peak Picking]

| No. | Position | Intensity |
|-----|----------|-----------|-----|----------|-----------|-----|----------|-----------|-----|----------|-----------|
| 1   | 696.105  | 95.34     | 2   | 740.531  | 86.76     | 3   | 809.956  | 92.30     | 4   | 883.238  | 93.94     |
| 5   | 979.661  | 86.19     | 6   | 1052.94  | 82.14     | 7   | 1168.65  | 74.17     | 8   | 1207.22  | 72.73     |
| 9   | 1268.93  | 76.80     | 10  | 1346.07  | 84.00     | 11  | 1392.35  | 92.06     | 12  | 1442.49  | 87.11     |
| 13  | 1735.62  | 64.55     | 14  | 2275.59  | 90.50     | 15  | 2958.27  | 94.55     |     |          |           |

**Figure S64**, FTIR of compound **9**
